# Supplementary material for: Transcriptomics and metabolomics reveal tolerance new mechanism of rice roots to Al stress
Source: Front Genet. 2023 Jan 10;13:1063984. doi: 10.3389/fgene.2022.1063984 (PMC9871393; doi:10.3389/fgene.2022.1063984)
Supplement: Supplementary file 2 [file Table1.XLSX]

## Sheet: Table S1
Gene ID	Forward primer（5'- 3'）	Reverse primer（5'- 3'）	Gene name	Cultivar
Os03g0439800	AGCCAGCTTGAGACCAACAA	AGAATCAAGCAACCTTCTCTCA	Uncharacterized protein At2g23090	KR,MR
Os03g0439900	AAGCCATTTCCCACCACAAC	CCCAGTGATACGAGCTTTGC	Similar to OSIGBa0092G14.3 protein.	KR,MR
Os03g0441000	CTAGTGACAGCCCAAGACCA	GGCAATGGACGAGCATGAAT	Transcription initiation factor TFIID subunit 4b	KR,MR
Os04g0127200	GATGGTGTCGATGTGCTGTC	TGGGGAAAGCACGGTCTATT	Subtilisin-like protease SBT3.8	KR,MR
Os04g0127300	CAACAACGGTGCTGAGAACA	GCTTCCCTGAACCTTGTGTG	Subtilisin-like protease SBT3.8	KR,MR

## Sheet: Table S2
sample	library	raw_reads	clean_reads	clean_bases(Gb)	Number(%)	error_rate	Q20(%)	Q30(%)	GC_pct(%)
KR-CK-1	FRAS202065115-1a	47031270	45990002	6.9	97.79	0.02	98.09	94.75	53.69
KR-CK-2	FRAS202065116-1a	49353492	48289032	7.24	97.84	0.02	98.04	94.66	53.95
KR-CK-3	FRAS202065117-1a	49785934	48508374	7.28	97.43	0.02	98.07	94.76	54.1
KR-Al-1	FRAS202065118-1a	52107860	50902116	7.64	97.69	0.02	98.05	94.7	54.82
KR-Al-2	FRAS20H100143-1a	45613052	44419540	6.66	97.38	0.02	98.38	95.48	53.64
KR-Al-3	FRAS202065119-1a	47647230	46197200	6.93	96.96	0.02	98.17	94.95	53.68
MR-CK-1	FRAS202065120-1a	55027146	53787426	8.07	97.75	0.02	98.18	94.99	54.32
MR-CK-2	FRAS202065121-1a	44636974	43418548	6.51	97.27	0.02	98.13	94.86	54.1
MR-CK-3	FRAS202065122-1a	49940526	48840936	7.33	97.8	0.02	98.17	94.96	54.12
MR-Al-1	FRAS202065123-1a	48041876	46984646	7.05	97.8	0.02	98.29	95.3	55.28
MR-Al-2	FRAS20H101203-1a	51250502	50099186	7.51	97.75	0.02	98.47	95.45	53.28
MR-Al-3	FRAS202065124-1a	46214186	45280628	6.79	97.98	0.02	98.19	95.04	54.02

## Sheet: Table S3
KR
gene_id	Al	CK	log2FoldChange	pvalue	padj	gene_name	gene_chr	gene_start	gene_end	gene_strand	gene_length	gene_biotype	gene_description	tf_family	gene description
Os10g0206800	1323.24	888.734	0.573815	1.29002e-06	0.000201632	FRD3-like protein 2	10	7574038	7579887	+	2119	protein_coding	-	MatE	MATE
Os06g0695800	2158.21	1267.67	0.768112	1.99504e-06	0.000283327	SENSITIVE TO ALUMINIUM RHIZOTOXICITY 1	6	29072361	29076031	-	1533	protein_coding	-	ABC_tran	STAR1
Os04g0494900	99.7134	26.2727	1.91563	0.000175451	0.00942488	-	4	24744700	24746565	+	1595	protein_coding	-	-	uncharacterized LOC4336269
Os10g0524600	403.475	184.744	1.12938	0.000721577	0.0265466	Subtilisin 61, SUBTILISIN 61	10	20389644	20392184	-	2541	protein_coding	-	Peptidase_S8	Subtilisin-like Ser protease
Os04g0419100	133.78	60.2839	1.15041	0.00157052	0.045739	-	4	20716594	20717566	+	973	protein_coding	-	-	Hypothetical protein
MR
gene_id	Al	CK	log2FoldChange	pvalue	padj	gene_name	gene_chr	gene_start	gene_end	gene_strand	gene_length	gene_biotype	gene_description	tf_family
Os10g0578800	4377.97	1834.21	1.25532	1.3088e-42	6.64687e-39	-	10	23075402	23079074	-	3548	protein_coding	-	-	plastidal glycolate/glycerate translocator 1
Os10g0206800	1750.32	863.487	1.02019	1.58153e-21	6.37455e-19	FRD3-like protein 2	10	7574038	7579887	+	2119	protein_coding	-	MatE	MATE
Os06g0695800	2535.1	1242.26	1.02879	2.19212e-16	5.10683e-14	SENSITIVE TO ALUMINIUM RHIZOTOXICITY 1	6	29072361	29076031	-	1533	protein_coding	-	ABC_tran	STAR1
Os02g0131800	944.66	465.876	1.01862	1.02025e-11	1.37804e-09	NATURAL RESISTANCE-ASSOCIATED MACROPHAGE PROTEIN 4	2	1658576	1662644	-	1874	protein_coding	-	-	Nramp
Os01g0766300	1667.42	853.359	0.96622	8.28607e-10	8.65877e-08	-	1	32289147	32289742	-	596	protein_coding	-	-	Hypothetical protein
Os12g0227400	1591.65	872.757	0.865458	1.43058e-08	1.20287e-06	-	12	6932587	6937071	+	1237	protein_coding	-	ADH_zinc_N	Allyl alcohol dehydrogenase
Os04g0494900	181.804	57.9208	1.65475	4.83383e-08	3.65314e-06	-	4	24744700	24746565	+	1595	protein_coding	-	-	uncharacterized LOC4336269
Os07g0493100	86.9936	26.5985	1.70398	2.82377e-07	1.89693e-05	-	7	18412069	18414214	+	1483	protein_coding	-	-	Non-protein coding transcript
Os02g0186800	221.451	124.12	0.832131	2.50316e-05	0.00110352	-	2	4824246	4825855	+	1530	protein_coding	-	p450	Cytochrome P450 family protein
Os01g0652100	128.953	67.0119	0.942774	0.00017745	0.00622375	trichome birefringence-like 21	1	26368398	26374101	-	2658	protein_coding	-	-	PMR5-like DUF231 domain containing protein
Os03g0755100	2231.55	1754.19	0.347278	0.00037502	0.0116417	ALUMINUM SENSITIVE 1	3	31149940	31155280	+	2345	protein_coding	-	ABC_membrane	At ALS1 homolog
Os02g0770800	171.152	332.834	-0.959054	0.000113887	0.00430346	OsNIA1, OsNia1	2	32513749	32517155	-	3050	protein_coding	-	NAD_binding_1	Nitrate reductase

## Sheet: Table S4
Index	Formula	Compounds	Class I	Class II	CAS	Level	Al-1	Al-2	Al-3	CK-1	CK-2	CK-3	VIP	Fold_Change	Log2FC	Type
pmb0069	C7H7NO	Benzamide	Others	Others	55-21-0	B	2820000	2910000	2540000	6600000	6860000	6740000	1.44	2.44	1.29	up
mws0572	C5H7N3O	5-Methylcytosine	Nucleotides and derivatives	Nucleotides and derivatives	554-01-8	B	235000	234000	157000	72500	48900	58800	1.38	0.288	########	down
pme0033	C5H4N4O	Hypoxanthine	Nucleotides and derivatives	Nucleotides and derivatives	68-94-0	A	14700000	13100000	6430000	4060000	3460000	3260000	1.29	0.315	########	down
mws1078	C7H7NO2	Anthranilic Acid	Phenolic acids	Phenolic acids	118-92-3	B	47400	132000	66800	276000	200000	162000	1.21	2.59	1.37	up
mws2213	C9H8O2	Cinnamic acid	Phenolic acids	Phenolic acids	140-10-3	B	4790	6880	6280	25100	9380	10000	1.1	2.48	1.31	up
mws0145	C8H8O3	2-Methoxybenzoic acid*	Phenolic acids	Phenolic acids	529-75-9	B	339000	174000	174000	101000	69900	70500	1.3	0.351	########	down
mws0183	C7H6O4	Protocatechuic acid*	Flavonoids	Flavanols	99-50-3	B	65800	192000	240000	407000	455000	235000	1	2.2	1.14	up
mws0180	C7H6O4	2,5-Dihydroxybenzoic acid*	Phenolic acids	Phenolic acids	490-79-9	A	15400	67100	130000	308000	215000	269000	1.14	3.73	1.9	up
mws0639	C7H6O4	2,3-Dihydroxybenzoic Acid*	Organic acids	Organic acids	303-38-8	B	104000	245000	328000	555000	649000	332000	1.06	2.27	1.18	up
mws0005	C10H12N2	Tryptamine	Alkaloids	Plumerane	61-54-1	B	13100000	14300000	19700000	32700000	39300000	33300000	1.36	2.24	1.16	up
mws0274	C9H10O3	Phenyllactate(PLA)	Organic acids	Organic acids	828-01-3	B	22000	34000	23900	96500	37900	36500	1	2.14	1.1	up
pme2853	C8H15NO3	Hexanoyl glycine	Amino acids and derivatives	Amino acids and derivatives	24003-67-6	B	40800	51500	21400	278000	213000	318000	1.4	7.12	2.83	up
mws1208	C10H22O2	1,10-Decanediol	Others	Saccharides and Alcohols	112-47-0	B	535000	383000	161000	160000	135000	119000	1.09	0.383	########	down
pme2024	C10H12N2O	Serotonin	Alkaloids	Plumerane	50-67-9	A	6270000	6220000	4250000	13900000	12000000	13100000	1.39	2.33	1.22	up
pmb0468	C6H11NO3S	N-formylmethionine	Amino acids and derivatives	Amino acids and derivatives	4289-98-9	B	10900000	9860000	7320000	21900000	19100000	24500000	1.39	2.33	1.22	up
mws1200	C10H10O3	Trans-4-Hydroxycinnamic Acid Methyl Ester*	Phenolic acids	Phenolic acids	19367-38-5	A	2980000	2880000	2680000	5880000	6540000	5190000	1.41	2.06	1.04	up
pmf0348	C10H20O3	2,6-Dimethyl-7-octene-2,3,6-triol	Others	Saccharides and Alcohols	73815-21-1	B	19600000	17400000	9400000	9960000	6440000	5650000	1.14	0.475	########	down
mws2218	C8H10N4O2	Caffeine	Alkaloids	Alkaloids	21399	B	631000	353000	241000	79200	74300	101000	1.34	0.208	########	down
pme1194	C9H13N3O4	Deoxycytidine	Nucleotides and derivatives	Nucleotides and derivatives	951-77-9	B	5000000	4180000	1310000	873000	613000	612000	1.23	0.2	########	down
pme0264	C10H14N2O5	Thymidine	Nucleotides and derivatives	Nucleotides and derivatives	50-89-5	B	1530000	1390000	614000	451000	326000	348000	1.25	0.318	########	down
pme3732	C9H13N3O5	Cytidine	Nucleotides and derivatives	Nucleotides and derivatives	65-46-3	B	4540000	4700000	2540000	2270000	1860000	1720000	1.21	0.496	########	down
pmb2591	C13H14N2O3	Acetyltryptophan	Amino acids and derivatives	Amino acids and derivatives	138798	A	104000	101000	80700	195000	241000	280000	1.4	2.51	1.33	up
pme3961	C10H13N5O3	Deoxyadenosine	Nucleotides and derivatives	Nucleotides and derivatives	958-09-8	A	11900000	18400000	9080000	7630000	4700000	4570000	1.21	0.43	########	down
pme2776	C10H12N4O4	2'-Deoxyinosine	Nucleotides and derivatives	Nucleotides and derivatives	890-38-0	B	531000	776000	459000	470000	138000	159000	1.1	0.435	########	down
mws0715	C13H16N2O4	Phenylacetyl-L-glutamine	Amino acids and derivatives	Amino acids and derivatives	28047-15-6	B	41500	42600	20900	86400	66900	111000	1.28	2.52	1.33	up
pme1184	C10H13N5O4	Deoxyguanosine*	Nucleotides and derivatives	Nucleotides and derivatives	961-07-9	B	2030000	2430000	1050000	825000	512000	528000	1.25	0.339	########	down
mws1038	C11H22N2O4S	(R)-Pantetheine	Others	Others	496-65-1	A	228000	248000	181000	363000	624000	473000	1.32	2.22	1.15	up
pmp001269	C18H39NO	Hexadecyl ethanolamine	Others	Others	-	B	884000	1420000	1260000	2870000	2680000	2400000	1.35	2.23	1.16	up
pme3279	C15H10O6	2'-Hydroxygenistein	Flavonoids	Isoflavones	1156-78-1	B	587000	515000	270000	1800000	862000	781000	1.13	2.51	1.33	up
pmb2786	C18H30O3	9-HOTrE	Lipids	Free fatty acids	89886-42-0	B	1110000	1390000	867000	655000	508000	453000	1.3	0.48	########	down
mws0058	C16H12O6	Diosmetin	Flavonoids	Flavonoid	520-34-3	A	9400	50600	23700	107000	54200	48500	1.02	2.51	1.33	up
pmb0767	C18H39NO2	D-erythro-Dihydrosphingosine	Lipids	Sphingolipids	764-22-7	A	892000	1440000	1260000	2570000	2510000	2250000	1.34	2.04	1.03	up
pmn001689	C18H32O4	9-Hydroxy-12-oxo-10-octadecenoic acid*	Lipids	Free fatty acids	-	B	125000	113000	33900	42200	19200	20600	1.08	0.302	########	down
pmp000107	C18H16O6	Monohydroxy-trimethoxyflavone	Flavonoids	Other Flavonoids	-	B	146000	131000	89900	1830000	704000	549000	1.34	8.39	3.07	up
pmn001690	C16H24O7	3-Hydroxy-4-isopropylbenzylalcohol 3-glucoside	Phenolic acids	Phenolic acids	-	B	43200	41200	43300	109000	85000	140000	1.39	2.61	1.39	up
pmn001691	C18H32O5	9,12,13-Trihyroxy-10,15-octadecadienoic acid	Lipids	Free fatty acids	-	A	985000	1060000	508000	527000	396000	332000	1.13	0.492	########	down
mws0371	C22H32O2	Cis-4,7,10,13,16,19-Docosahexaenoic Acid(C22:6n3)	Lipids	Free fatty acids	6217-54-5	B	2870	2230	2310	1620	1110	910	1.31	0.489	########	down
Lmtn002565	C14H18O9	1'-O-vanilloyl-β-D-glucoside	Phenolic acids	Phenolic acids	-	A	703000	750000	613000	2150000	1420000	1710000	1.39	2.55	1.35	up
pmp000260	C13H16O10	6-O-Galloyl-β-D-glucopyranoside	Phenolic acids	Phenolic acids	-	B	58100	66100	35700	133000	137000	122000	1.35	2.46	1.3	up
pmn001518	C13H16O10	1-O-Galloyl-β-D-glucose*	Phenolic acids	Phenolic acids	-	A	62400	86600	46900	114000	167000	156000	1.3	2.23	1.16	up
HmLn000659	C13H16O10	3-O-galloyl-β-D-glucose*	Tannins	Tannin	-	A	10600000	15100000	6840000	25000000	21900000	28200000	1.29	2.31	1.21	up
pmb0776	C20H20N2O3	N-Feruloyl tryptamine	Alkaloids	Phenolamine	53905-13-8	A	258000	324000	221000	779000	831000	843000	1.43	3.06	1.61	up
pme0519	C12H22O11	D-(+)-Sucrose*	Others	Saccharides and Alcohols	57-50-1	A	6320000	7240000	6070000	11000000	13800000	14700000	1.4	2.02	1.01	up
pmb0770	C20H20N2O4	N-Feruloyl serotonin	Alkaloids	Phenolamine	68573-23-9	A	3370000	4370000	2970000	13500000	12500000	13400000	1.43	3.67	1.88	up
Zmhn002422	C16H20O9	Feruloyl glucose	Phenolic acids	Phenolic acids	-	A	172000	232000	136000	539000	475000	668000	1.39	3.11	1.64	up
pme0085	C18H16O8	Rosmarinic acid	Phenolic acids	Phenolic acids	537-15-5	B	139000	163000	196000	57900	98100	53600	1.32	0.42	########	down
pmp000113	C20H20O8	5-Hydroxy-6,7,8,3',4'-pentamethoxyflavone	Flavonoids	Flavonoid	2174-59-6	B	746000	571000	531000	5230000	1270000	1140000	1.08	4.13	2.04	up
pmb0500	C23H26N2O5	"N',N""-p-Coumaroyl-feruloyl putrescine"	Alkaloids	Phenolamine	-	A	59700	67700	69400	166000	148000	182000	1.43	2.52	1.33	up
pmn001319	C22H22O8	1-O-Feruloyl-3-O-p-Coumaroyl glycerol	Phenolic acids	Phenolic acids	-	A	161000	188000	300000	577000	514000	442000	1.3	2.36	1.24	up
pmn001663	C22H26O8	Syringaresinol	Lignans and Coumarins	Lignans	21453-69-0	A	15800	17700	22400	63000	32500	37900	1.26	2.39	1.26	up
pmd0158	C19H40NO7P	LysoPE 14:0 (2n isomer)	Lipids	LPE	-	B	392000	369000	245000	692000	784000	753000	1.36	2.21	1.15	up
Lmlp003201	C21H20O10	5,7,4'-Trihydroxy-8-C-β-D-glucopyranosylflavone*	Flavonoids	Flavonoid carbonoside	-	A	2440000	5170000	2660000	10800000	8850000	5320000	1.18	2.44	1.28	up
mws1434	C21H20O10	Isovitexin*	Flavonoids	Flavonoid carbonoside	29702-25-8	A	574000	1170000	599000	4340000	3010000	1570000	1.25	3.82	1.93	up
pmp000413	C21H20O10	Genistein 8-C-glucoside*	Flavonoids	Flavonoid carbonoside	66026-80-0	B	1980000	4730000	2390000	9290000	7940000	4590000	1.15	2.4	1.26	up
mws0045	C21H20O11	Quercitrin	Flavonoids	Flavonols	522-12-3	B	446000	379000	203000	1550000	796000	519000	1.11	2.78	1.48	up
mws1299	C21H20O11	Orientin*	Flavonoids	Flavonoid carbonoside	28608-75-5	B	454000	3620000	1770000	5710000	9620000	3170000	1.02	3.17	1.66	up
mws1048	C21H20O11	Cyanidin 3-O-galactoside	Flavonoids	Anthocyanins	27661-36-5	A	337000	4540000	2770000	8190000	13500000	6210000	1.03	3.65	1.87	up
mws1608	C21H20O11	HoMoorientin*	Flavonoids	Flavonoid carbonoside	4261-42-1	A	88900	825000	363000	2040000	3310000	1070000	1.14	5.03	2.33	up
pmb0550	C21H21O11	Cyanidin 3-O-glucoside(Kuromanin)	Flavonoids	Anthocyanins	7084-24-4	B	414000	5450000	3310000	10500000	17300000	7620000	1.05	3.86	1.95	up
pmb0464	C16H27NO14	Aspartic acid di-O-glucoside	Amino acids and derivatives	Amino acids and derivatives	-	B	3970000	5030000	4260000	9750000	10300000	11700000	1.43	2.4	1.26	up
Zmhn003191	C22H22O11	Isoscoparin*	Flavonoids	Flavonoid	20013-23-4	A	1140000	2960000	1460000	9210000	7060000	4710000	1.29	3.77	1.92	up
pmp000120	C22H22O11	Diosmetin-6-C-glucoside	Flavonoids	Flavonoid	-	A	1460000	3790000	1780000	6870000	6860000	4120000	1.2	2.54	1.34	up
Lmzp002365	C22H24O11	hesperetin-7-O-glucoside	Flavonoids	Flavonoid	31712-49-9	A	6860000	5540000	3100000	24900000	12000000	7870000	1.1	2.89	1.53	up
pmb3116	C23H42NO7P	LysoPE 18:3	Lipids	LPE	-	B	16100	7020	6560	31200	29800	22100	1.25	2.8	1.49	up
pmb0880	C23H48NO7P	LysoPE 18:0(2n isomer)	Lipids	LPE	-	B	466000	542000	505000	217000	249000	140000	1.37	0.401	########	down
pmb3072	C22H26O12	3-O-p-coumaroyl shikimic acid O-hexoside	Phenolic acids	Phenolic acids	-	B	111000	153000	95400	254000	251000	259000	1.37	2.13	1.09	up
Hmyn007081	C22H43O9P	LysoPG(16:1)	Lipids	Glycerol ester	-	B	23100	17000	9430	43200	52800	38700	1.28	2.72	1.45	up
pmn001671	C23H32O15	β-D-Furanofructosyl-α-D-(6-mustard acyl)glucoside*	Phenolic acids	Phenolic acids	-	B	68600	122000	86900	165000	174000	292000	1.26	2.27	1.18	up
mws1066	C27H32O14	Narirutin*	Flavonoids	Dihydroflavone	14259-46-2	A	4720000	3310000	1930000	28700000	11000000	7260000	1.19	4.72	2.24	up
Zmhp002798	C27H30O15	Isosaponarin	Flavonoids	Flavonoid	19416-87-6	A	1860000	3660000	2670000	7610000	6710000	4380000	1.22	2.28	1.19	up
mws1073	C27H30O15	Apigenin 6,8-C-diglucoside*	Flavonoids	Flavonoid	23666-13-9	A	853000	648000	356000	4170000	1760000	1130000	1.15	3.8	1.93	up
pmn001713	C27H30O15	Luteolin-7-O-β-D-rutinoside*	Flavonoids	Flavonoid	-	B	75000	36700	16400	341000	108000	91000	1.1	4.22	2.08	up
mws0169	C27H31ClO15	Cyanidin 3-rutinoside(Keracyanin chloride)	Flavonoids	Anthocyanins	18719-76-1	A	217000	2130000	2090000	5610000	11100000	5320000	1.12	4.98	2.32	up
pmb3002	C28H32O15	Chrysoeriol 7-O-rutinoside*	Flavonoids	Flavonoid	-	A	137000	262000	184000	926000	694000	352000	1.24	3.38	1.76	up
pmp001080	C28H32O15	Neodiosmin*	Flavonoids	Flavonoid	38665-01-9	B	727000	1670000	1040000	4050000	3760000	2030000	1.23	2.86	1.51	up
pmp000594	C28H32O15	Diosmetin-7-O-rutin*	Flavonoids	Flavonoid	-	A	721000	1690000	1020000	4100000	3420000	1930000	1.2	2.75	1.46	up
Hmmp002336	C30H26O14	Quercetin-O-feruloyl-Pentoside	Flavonoids	Flavonols	-	A	205000	1050000	1040000	2120000	2610000	1370000	1.03	2.65	1.41	up
Lmmp003091	C27H30O16	Quercetin glu-rha	Flavonoids	Flavonols	-	B	22000000	18100000	9850000	70200000	38800000	28000000	1.16	2.74	1.45	up
Zmhp002574	C27H30O16	Iso-8-C-hexosyl-luteolin O-hexoside*	Flavonoids	Flavonoid carbonoside	-	A	32100	208000	205000	620000	1050000	369000	1.12	4.58	2.19	up
pmn001583	C27H30O16	Bioquercetin*	Flavonoids	Flavonols	52525-35-6	A	32900	146000	116000	428000	435000	221000	1.17	3.67	1.88	up
pme0001	C28H34O15	Hesperetin 7-O-neohesperidoside(Neohesperidin)	Flavonoids	Dihydroflavone	13241-33-3	A	8050000	6940000	4170000	40500000	16500000	11600000	1.16	3.58	1.84	up
mws0036	C28H34O15	Hesperidin	Flavonoids	Dihydroflavone	520-26-3	B	7580000	6380000	3710000	37100000	16500000	11300000	1.19	3.67	1.88	up
Zmxp002867	C28H32O16	Chrysoeriol-di-O-glucoside*	Flavonoids	Flavonoid	-	B	77800	131000	103000	229000	288000	118000	1.04	2.04	1.03	up
Zmhp002897	C28H32O16	Isochrysoeriol C-hexosyl-O-hexoside	Flavonoids	Flavonoid	-	A	1170000	3090000	2320000	6480000	9100000	4240000	1.21	3.02	1.59	up
pmp000127	C28H32O16	Chysoeriol-6,8-di-C-glucoside*	Flavonoids	Flavonoid carbonoside	-	A	358000	297000	159000	2550000	988000	563000	1.18	5.04	2.33	up
pmb3043	C29H34O16	Tricin 5-O-rutinoside	Flavonoids	Flavonoid	-	B	29400	141000	78600	220000	247000	134000	1.05	2.42	1.27	up
pmb0530	C21H27N7O14P2	Nicotinic acid adenine dinucleotide	Nucleotides and derivatives	Nucleotides and derivatives	53-84-9	A	2530000	2650000	2680000	1290000	1270000	1240000	1.44	0.482	########	down
pmp000130	C39H50O23	Natsudaidain 3-O-(5-glucosyl-3-hydroxy-3-methylglutarate)-glucoside)	Flavonoids	Flavonols	-	A	56200	54400	45900	166000	102000	128000	1.37	2.53	1.34	up

## Sheet: Table S5
Index	Formula	Compounds	Class I	Class II	CAS	Level	Al-1	Al-2	Al-3	CK-1	CK-2	CK-3	VIP	Fold_Change	Log2FC	Type
pme2621	C5H5NO2	Pyrrole-2-carboxylic acid	Amino acids and derivatives	Amino acids and derivatives	634-97-9	B	23200	69800	36000	23600	19400	19900	1.05	0.488	########	down
mws0376	C4H4O4	Fumaric acid	Organic acids	Organic acids	110-17-8	B	297000	986000	431000	255000	249000	211000	1.1	0.417	########	down
pmb0069	C7H7NO	Benzamide	Others	Others	55-21-0	B	2870000	2730000	2860000	7080000	7430000	7300000	1.53	2.58	1.37	up
mws0251	C5H6N2O2	Thymine	Nucleotides and derivatives	Nucleotides and derivatives	65-71-4	B	456000	1230000	703000	323000	291000	159000	1.27	0.323	########	down
mws0425	C5H6O4	Citraconic acid	Organic acids	Organic acids	498-23-7	B	133000	396000	172000	64800	59400	67700	1.34	0.273	########	down
mws1024	C9H8O2	p-Coumaraldehyde	Phenolic acids	Phenolic acids	2538-87-6	B	63800	126000	74200	36300	51400	39700	1.28	0.483	########	down
mws0009	C10H10O3	Coniferaldehyde	Phenolic acids	Phenolic acids	20649-42-7	B	157000	258000	169000	111000	98200	58600	1.3	0.459	########	down
mws0093	C10H12O3	Coniferyl alcohol	Phenolic acids	Phenolic acids	458-35-5	B	109000	267000	115000	60100	67600	53100	1.29	0.368	########	down
mws2218	C8H10N4O2	Caffeine	Alkaloids	Alkaloids	21399	B	66100	198000	69300	245000	331000	778000	1.25	4.06	2.02	up
pme1261	C9H19NO4	Pantothenol	Others	Saccharides and Alcohols	16485-10-2	B	2990000	2300000	2120000	4490000	5510000	6170000	1.44	2.18	1.13	up
mws0268	C10H12N4O5	Inosine	Nucleotides and derivatives	Nucleotides and derivatives	58-63-9	B	19100	23600	13300	45000	38700	43000	1.41	2.26	1.18	up
mws1060	C10H12N4O5	9-(β-D-Arabinofuranosyl)hypoxanthine	Nucleotides and derivatives	Nucleotides and derivatives	7013-16-3	A	756000	1120000	990000	3050000	1890000	2740000	1.43	2.67	1.42	up
pmb0508	C14H20N4O2	N-p-Coumaroyl agmatine	Alkaloids	Phenolamine	7295-86-5	A	716000	614000	687000	1550000	1130000	1560000	1.46	2.1	1.07	up
YC512118	C18H35NO	Octadecenoic amide	Others	Others	-	A	1800000	2000000	1280000	599000	615000	849000	1.43	0.406	########	down
pmb0197	C11H15N5O5	N2-methylguanosine	Nucleotides and derivatives	Nucleotides and derivatives	-	B	144000	108000	113000	294000	136000	359000	1.15	2.16	1.11	up
mws0371	C22H32O2	Cis-4,7,10,13,16,19-Docosahexaenoic Acid(C22:6n3)	Lipids	Free fatty acids	6217-54-5	B	2610	3340	3260	847	1420	1580	1.39	0.418	########	down
pmb3894	C17H14O7	Di-O-methylquercetin	Flavonoids	Flavonols	61395	A	7820000	8950000	8370000	18000000	19200000	16100000	1.51	2.12	1.09	up
Zmhn003534	C21H22O10	Naringenin-O-glucoside	Flavonoids	Flavonoid	-	A	860000	422000	883000	164000	51400	613000	1.03	0.383	########	down
mws2209	C21H20O11	Astragalin*	Flavonoids	Flavonols	480-10-4	B	76700	46800	72400	20000	10000	57000	1.07	0.444	########	down
mws0089	C21H20O11	Kaempferol 7-O-glucosdie*	Flavonoids	Flavonols	16290-07-6	B	83900	66600	60600	19100	12100	69000	1.06	0.475	########	down
pmb3116	C23H42NO7P	LysoPE 18:3	Lipids	LPE	-	B	5150	9500	8520	18200	25700	13800	1.33	2.49	1.32	up
pmb0880	C23H48NO7P	LysoPE 18:0(2n isomer)	Lipids	LPE	-	B	744000	972000	823000	360000	372000	407000	1.5	0.449	########	down
Hmyn007081	C22H43O9P	LysoPG(16:1)	Lipids	Glycerol ester	-	B	13500	23400	24300	35300	66000	26500	1.11	2.09	1.06	up
pmb0716	C29H34O17	Tricin di-O-hexoside	Flavonoids	Flavonoid	-	B	48000	93900	110000	149000	165000	189000	1.26	2	1	up
pmb0530	C21H27N7O14P2	Nicotinic acid adenine dinucleotide	Nucleotides and derivatives	Nucleotides and derivatives	53-84-9	A	3210000	2610000	2380000	1070000	838000	962000	1.5	0.35	########	down
pme2651	C21H28N7O17P3	NADP	Nucleotides and derivatives	Nucleotides and derivatives	53-59-8	B	201000	168000	197000	106000	84100	77400	1.47	0.473	########	down
pmp000130	C39H50O23	Natsudaidain 3-O-(5-glucosyl-3-hydroxy-3-methylglutarate)-glucoside)	Flavonoids	Flavonols	-	A	38800	21900	44400	124000	100000	124000	1.44	3.31	1.73	up

## Sheet: Table S6
							KR			MR
Index	Formula	Compounds	Class I	Class II	CAS	Level	Al-1	Al-2	Al-3	Al-1	Al-2	Al-3	VIP	Fold_Change	Log2FC	Type
pme3200	C2H7N3	1-methylguanidine	Nucleotides and derivatives	Nucleotides and derivatives	471-29-4	B	417340	423570	408360	323570	283870	344220	1.34344	0.761773	-0.392567	insig
pme1988	C3H7NO2	L-Alanine	Amino acids and derivatives	Amino acids and derivatives	56-41-7	B	10633000	11114000	8609400	9902700	9502500	9210000	0.471804	0.942641	-0.085219	insig
pmf0096	C2H2O4	Oxalic acid	Organic acids	Organic acids	144-62-7	B	1465900	1465200	842420	927990	619100	411280	1.10669	0.518977	-0.946258	insig
mws4052	C4H7NO2	1-Aminocyclopropane-1-carboxylic acid	Others	Others	22059-21-8	A	1507600	1916900	2110800	1317100	1122000	1283300	1.27704	0.672484	-0.572428	insig
pmf0256	C6H14O	3-Methyl-1-pentanol	Others	Saccharides and Alcohols	589-35-5	B	659200	509910	432400	451960	487640	373990	0.78708	0.82022	-0.285918	insig
pme3033	C4H9NO2	N,N-Dimethylglycine*	Amino acids and derivatives	Amino acids and derivatives	1118-68-9	B	5574000	5703900	4133300	5559100	4920300	7513500	0.613045	1.16752	0.223449	insig
pme3017	C4H9NO2	2-Aminoisobutyric acid*	Amino acids and derivatives	Amino acids and derivatives	62-57-7	A	15030000	15271000	11719000	16906000	16444000	17402000	1.08571	1.20781	0.272389	insig
pme3011	C4H9NO2	γ-Aminobutyric acid*	Organic acids	Organic acids	56-12-2	B	9957700	9438600	6750100	9672900	8635500	14507000	0.707043	1.25506	0.327761	insig
pme2049	C4H8O3	2-Hydroxybutanoic acid*	Organic acids	Organic acids	600-15-7	B	407390	387080	287610	224240	201750	157050	1.31705	0.538814	-0.89214	insig
mws0574	C4H8O3	α-Hydroxyisobutyric acid*	Organic acids	Organic acids	594-61-6	A	65195	61874	44004	40725	30269	27171	1.24557	0.573819	-0.801331	insig
mws0206	C4H8O3	(S)-2-Hydroxybutanoicacid*	Organic acids	Organic acids	3347-90-8	B	41614	46833	28218	25012	21343	21568	1.2518	0.582205	-0.7804	insig
mws0576	C4H8O3	3-Hydroxybutanoic Acid*	Organic acids	Organic acids	300-85-6	B	1236800	1228500	695680	1306400	1125200	1024200	0.396151	1.09327	0.128648	insig
pme0010	C3H7NO3	L-Serine	Amino acids and derivatives	Amino acids and derivatives	56-45-1	A	10137000	10822000	8886600	8928300	8455700	8441200	1.12373	0.865293	-0.208739	insig
pme2433	C4H11NO2	Diethanolamine	Others	Others	111-42-2	B	619350	688460	534740	558330	419920	434720	1.11909	0.766856	-0.382973	insig
Hmbp000904	C7H6O	Benzaldehyde	Others	Others	100-52-7	A	14904000	14107000	12478000	15966000	14017000	15365000	0.838174	1.09301	0.12831	insig
pme2621	C5H5NO2	Pyrrole-2-carboxylic acid	Amino acids and derivatives	Amino acids and derivatives	634-97-9	B	28652	21339	93095	23176	69792	36043	0.0214073	0.901633	-0.149388	insig
mws0255	C4H5N3O	Cytosine	Nucleotides and derivatives	Nucleotides and derivatives	71-30-7	A	1416400	1562100	1873600	1197400	2111400	1549900	0.0809152	1.00136	0.00196107	insig
pme2122	C5H9N3	Histamine	Amino acids and derivatives	Amino acids and derivatives	51-45-6	B	1416300	1324000	1757100	1234400	1818800	1450800	0.011864	1.00147	0.00211562	insig
mws0177	C5H4O3	2-Furanoic acid	Organic acids	Organic acids	88-14-2	B	157550	160310	168120	132960	223270	196060	0.46624	1.13645	0.184529	insig
pme0257	C4H4N2O2	Uracil	Nucleotides and derivatives	Nucleotides and derivatives	66-22-8	A	787120	1057100	1062800	1006900	890880	949400	0.119077	0.979415	-0.0300073	insig
pme0006	C5H9NO2	L-Proline	Amino acids and derivatives	Amino acids and derivatives	147-85-3	A	2013900	2035100	1904800	1911300	1542700	1686000	1.10495	0.863314	-0.212042	insig
mws0376	C4H4O4	Fumaric acid	Organic acids	Organic acids	110-17-8	B	182580	289800	1363700	296680	985890	430810	0.186269	0.933173	-0.0997838	insig
mws0823	C5H8O3	3-Methyl-2-Oxobutanoic acid*	Organic acids	Organic acids	759-05-7	B	160290	133950	123080	145570	128180	117990	0.418254	0.938704	-0.0912576	insig
pme0275	C5H8O3	4-Oxopentanoate*	Organic acids	Organic acids	123-76-2	B	26353	26594	35074	29599	30900	23035	0.28831	0.949024	-0.0754842	insig
pme0066	C3H7N3O2	Guanidineacetic acid	Amino acids and derivatives	Amino acids and derivatives	352-97-6	B	56420	56458	38933	52722	38517	47086	0.398876	0.911166	-0.134214	insig
pmb1096	C8H7N	Indole	Alkaloids	Plumerane	120-72-9	B	21364000	21394000	17717000	17060000	15338000	17231000	1.17131	0.820653	-0.285155	insig
mws0256	C5H11NO2	L-Valine*	Amino acids and derivatives	Amino acids and derivatives	72-18-4	A	28035000	28398000	23598000	29544000	25274000	28589000	0.38915	1.04218	0.0596095	insig
mws0191	C5H11NO2	Betaine*	Alkaloids	Alkaloids	107-43-7	B	10011000	12790000	7045600	15459000	12746000	16989000	1.08502	1.51421	0.598565	insig
pme0120	C5H11NO2	5-Aminovaleric acid*	Amino acids and derivatives	Amino acids and derivatives	660-88-8	B	559720	548880	486860	831610	866550	895430	1.43362	1.62561	0.700978	insig
pme1730	C4H6O4	D-Erythronolactone	Organic acids	Organic acids	15667-21-7	B	616400	549670	550930	446410	420020	431290	1.3902	0.755807	-0.403911	insig
mws0192	C4H6O4	Succinic acid*	Organic acids	Organic acids	110-15-6	A	39943000	43004000	40280000	35053000	30277000	30339000	1.35581	0.776364	-0.365195	insig
mws0470	C4H6O4	Methylmalonic acid*	Organic acids	Organic acids	516-05-2	A	40745000	43703000	40761000	35833000	29850000	29705000	1.32702	0.76183	-0.392459	insig
mws0147	C5H10O3	3-Hydroxy-3-methyl butyric acid	Organic acids	Organic acids	625-08-1	B	719510	622060	555110	913230	885290	904460	1.3544	1.42511	0.511075	insig
pme3096	C3H5NO4	Aminomalonic acid	Organic acids	Organic acids	1068-84-4	B	1371200	1473200	1366000	1249100	1043300	1051600	1.29295	0.794224	-0.332382	insig
mws0671	C4H9NO3	L-Homoserine*	Organic acids	Organic acids	672-15-1	B	6674000	7295400	6446600	5888500	5501300	5458800	1.34204	0.825264	-0.277072	insig
mws0230	C4H9NO3	L-(-)-Threonine*	Amino acids and derivatives	Amino acids and derivatives	72-19-5	B	7270900	7922600	6655200	6282300	5801000	5923700	1.27644	0.824168	-0.27899	insig
pmp001287	C8H9N	N-Benzylmethylene isomethylamine	Alkaloids	Alkaloids	-	A	2394200	2341200	2050700	2786000	2490600	2697200	1.1855	1.17502	0.232685	insig
pma0134	C4H8O4	D(-)-Threose	Others	Saccharides and Alcohols	95-43-2	B	19968000	17043000	11101000	7809300	6949300	6666100	1.32426	0.445309	-1.16712	down
pmb0069	C7H7NO	Benzamide	Others	Others	55-21-0	B	2816300	2909500	2542200	2874600	2733900	2855000	0.386027	1.02365	0.033716	insig
pme0241	C7H6O2	Benzoic acid	Phenolic acids	Phenolic acids	65-85-0	B	270060	257150	184330	229310	273120	229770	0.205475	1.02904	0.0412929	insig
mws0628	C7H6O2	4-Hydroxybenzaldehyde	Phenolic acids	Phenolic acids	123-08-0	A	13101000	15343000	28904000	19873000	26852000	19653000	0.508165	1.15746	0.210962	insig
mws0133	C6H6N2O	Nicotinamide	Others	Vitamin	98-92-0	A	686250	579830	543610	576300	539770	751350	0.181569	1.0319	0.0453039	insig
pmf0141	C8H10O	2-Phenylethanol	Others	Others	60-12-8	B	4317300	3306700	2690300	3791400	4785700	3995100	0.839096	1.21891	0.285591	insig
pme0490	C6H5NO2	Nicotinic acid	Others	Vitamin	59-67-6	A	12903000	10725000	7477000	6378300	7055600	6998300	1.12153	0.656878	-0.606302	insig
pme1218	C6H5NO2	2-Picolinic acid	Organic acids	Organic acids	98-98-6	B	2336400	1893700	1458400	956490	1116100	979340	1.31462	0.536509	-0.898326	insig
pmb0302	C2H8NO3P	2-Aminoethylphosphonate	Lipids	Free fatty acids	2041-14-7	B	66577	81085	83137	103170	96294	86453	1.11625	1.23881	0.308959	insig
mws0572	C5H7N3O	5-Methylcytosine	Nucleotides and derivatives	Nucleotides and derivatives	554-01-8	B	235150	233530	156650	104080	136680	131700	1.23989	0.595622	-0.747532	insig
pmp001086	C6H6O3	5-Hydroxymethylfurfural	Phenolic acids	Phenolic acids	67-47-0	B	188970	325400	289840	226630	227440	264130	0.400129	0.89305	-0.163187	insig
pmp000509	C6H6O3	Maltol	Others	Others	118-71-8	B	352170	278260	291940	257500	268470	203220	1.05037	0.790561	-0.339051	insig
mws0251	C5H6N2O2	Thymine	Nucleotides and derivatives	Nucleotides and derivatives	65-71-4	B	156490	381020	1583100	455860	1233900	702890	0.442261	1.12828	0.17413	insig
mws0813	C5H7NO3	5-Oxoproline	Amino acids and derivatives	Amino acids and derivatives	149-87-1	B	821680	933610	741800	742170	710770	647470	1.10187	0.841143	-0.249577	insig
pme1368	C6H11NO2	L-Pipecolic acid	Amino acids and derivatives	Amino acids and derivatives	3105-95-1	A	778300	764310	667900	650680	684140	574490	1.0608	0.863742	-0.211328	insig
mws0425	C5H6O4	Citraconic acid	Organic acids	Organic acids	498-23-7	B	47141	128530	549270	133350	396130	172430	0.292501	0.968231	-0.0465775	insig
pmb0501	C5H14N4	Agmatine	Alkaloids	Phenolamine	306-60-5	B	941470	1197500	1316400	1602700	1133900	1110200	0.435715	1.11328	0.154819	insig
mws0216	C5H9NO3	Trans-4-Hydroxy-L-proline	Amino acids and derivatives	Amino acids and derivatives	51-35-4	B	17428000	14631000	11314000	20024000	16785000	20030000	1.05292	1.31047	0.390084	insig
mws0258	C6H13NO2	L-Isoleucine*	Amino acids and derivatives	Amino acids and derivatives	73-32-5	A	8935900	8689700	8002300	9709500	8559300	9254200	0.856966	1.07395	0.102922	insig
pmp001198	C6H13NO2	6-Deoxyfagomine*	Alkaloids	Alkaloids	197449-09-5	A	23439000	22707000	21400000	25133000	22419000	23162000	0.682324	1.0469	0.0661255	insig
mws0227	C6H13NO2	L-Leucine*	Amino acids and derivatives	Amino acids and derivatives	61-90-5	A	8892300	8292900	7785400	9271700	8547700	8798600	0.863082	1.06597	0.0921717	insig
pme0274	C6H13NO2	6-Aminocaproic acid*	Organic acids	Organic acids	60-32-2	B	219870	190970	158120	244020	197210	228250	0.875058	1.17667	0.234714	insig
pme3034	C5H8O4	ethylmalonate*	Organic acids	Organic acids	601-75-2	B	121320	89763	88828	156080	154140	149770	1.33618	1.53376	0.617068	insig
mws0473	C5H8O4	2-Methylsuccinic acid	Organic acids	Organic acids	498-21-5	B	2134600	1669700	1548500	2596300	2449800	2347400	1.25914	1.38124	0.465964	insig
pme0243	C5H8O4	Glutaric acid*	Organic acids	Organic acids	110-94-1	B	2051900	1571200	1447300	2432700	2344900	2164200	1.21827	1.36908	0.45321	insig
mws0001	C4H8N2O3	L-Asparagine Anhydrous	Amino acids and derivatives	Amino acids and derivatives	70-47-3	A	18379000	18004000	18436000	33655000	33352000	34917000	1.46079	1.85928	0.894746	insig
pmc0682	C8H8N2	4-Aminoindole	Alkaloids	Plumerane	5192-23-4	B	160250	168860	186320	326800	350440	261240	1.37991	1.82077	0.864549	insig
mws0972	C6H12O3	5-Hydroxyhexanoic acid	Organic acids	Organic acids	185956-02-9	B	235600	214610	130830	178870	184550	164270	0.260254	0.908182	-0.138947	insig
pme0286	C6H12O3	2-Hydroxyisocaproic acid	Organic acids	Organic acids	13748-90-8	B	117230	109510	108050	171140	125430	150920	1.22421	1.33663	0.418599	insig
pme2527	C5H12N2O2	L(+)-Ornithine	Amino acids and derivatives	Amino acids and derivatives	70-26-8	B	1269200	1441300	801800	907370	760220	508510	1.03084	0.619566	-0.690671	insig
mws0219	C4H7NO4	L-AsparticAcid	Amino acids and derivatives	Amino acids and derivatives	56-84-8	A	14225000	13406000	16040000	16417000	13954000	14542000	0.297432	1.02844	0.0404575	insig
mws1709	C4H6O5	Malic acid	Organic acids	Organic acids	636-61-3	A	42494000	38934000	33979000	33904000	33527000	36324000	0.854433	0.899036	-0.15355	insig
pme0057	C4H9NO2S	DL-Homocysteine	Amino acids and derivatives	Amino acids and derivatives	6027-13-0	B	1357200	1192300	1136700	792850	683670	664550	1.40352	0.580834	-0.783802	insig
pmb0374	C5H5N5	Aminopurine	Alkaloids	Alkaloids	452-06-2	A	8852800	12716000	11182000	5746300	7929900	5326200	1.27795	0.580212	-0.785349	insig
pme0040	C5H5N5	Adenine	Nucleotides and derivatives	Nucleotides and derivatives	73-24-5	B	846100	900390	851190	976570	937810	888670	1.0657	1.07906	0.109774	insig
pme0033	C5H4N4O	Hypoxanthine	Nucleotides and derivatives	Nucleotides and derivatives	68-94-0	A	14651000	13146000	6426600	5955100	6791800	7271200	0.97901	0.584921	-0.773686	insig
Hmbn002174	C8H8O2	4-Hydroxyacetophenone	Phenolic acids	Phenolic acids	99-93-4	A	809660	824470	598980	545930	475010	362880	1.2308	0.619683	-0.690398	insig
mws1078	C7H7NO2	Anthranilic Acid	Phenolic acids	Phenolic acids	118-92-3	B	47437	131910	66809	97556	51337	39963	0.467211	0.767221	-0.382286	insig
mws1336	C7H7NO2	4-Aminobenzoic acid	Phenolic acids	Phenolic acids	150-13-0	B	2363000	4029700	2664400	4736100	3716500	4692300	1.05293	1.45134	0.537382	insig
pme1709	C7H7NO2	Nicotinic Acid Methyl Ester (Methyl Nicotinate)	Others	Vitamin	93-60-7	B	6703100	5683000	4566600	3459900	2932900	3576100	1.30663	0.588042	-0.766009	insig
pme1002	C8H11NO	L-Tyramine*	Amino acids and derivatives	Amino acids and derivatives	51-67-2	A	18280000	15766000	14118000	18672000	16400000	15028000	0.306562	1.0402	0.0568554	insig
pma0948	C8H11NO	Hydroxyphenethylamine*	Others	Others	-	B	8496700	8246500	7292900	9106400	7986400	7854900	0.390157	1.03793	0.053704	insig
mws0749	C7H6O3	4-Hydroxybenzoic acid	Phenolic acids	Phenolic acids	99-96-7	B	20811000	19746000	14184000	16378000	17887000	13520000	0.600545	0.872929	-0.196064	insig
mws2368	C8H10O2	Tyrosol	Phenolic acids	Phenolic acids	501-94-0	B	30398	17501	11483	20686	32570	22544	0.647987	1.27648	0.352172	insig
pme1137	C6H5NO3	6-Hydroxynicotinic acid	Alkaloids	Alkaloids	5006-66-6	B	1785400	1747300	1035500	677540	610860	481890	1.34194	0.387525	-1.36764	down
pme2830	C2H8NO4P	O-Phosphorylethanolamine	Others	Others	1071-23-4	B	327360	354650	349400	366360	310230	396750	0.328393	1.04065	0.0574892	insig
pma2987	C6H11N3O	Histidinol	Others	Saccharides and Alcohols	4836-52-6	B	20023000	19878000	17339000	14033000	16020000	15151000	1.30118	0.789727	-0.340573	insig
pme3207	C6H6O4	Trans,trans-Muconic acid	Organic acids	Organic acids	3588-17-8	B	7809300	8012200	8450200	18281000	17798000	15650000	1.44411	2.13125	1.0917	up
pme2879	C5H6N2O3	5-Hydroxymethyluracil	Nucleotides and derivatives	Nucleotides and derivatives	4433-40-3	B	25883	15556	27100	40266	33890	37614	1.21178	1.63075	0.705536	insig
pmb0764	C6H9NOS	4-Methyl-5-thiazoleethanol	Others	Others	137-00-8	A	353970	518010	1530800	427760	775580	534050	0.23966	0.723075	-0.467783	insig
pme2723	C9H7NO	Indole-3-carboxaldehyde	Alkaloids	Plumerane	487-89-8	B	1477300	1910400	3563700	2412900	2445700	1936400	0.103761	0.977501	-0.03283	insig
pme0295	C6H11NO3	4-Acetamidobutyric acid	Organic acids	Organic acids	3025-96-5	B	255030	339910	536900	609550	646980	620450	1.14182	1.65834	0.729743	insig
mws0567	C5H11N3O2	4-Guanidinobutyric acid	Organic acids	Organic acids	463-00-3	A	18503000	19704000	20521000	18161000	13247000	14330000	1.16297	0.778811	-0.360655	insig
mws0017	C7H19N3	Spermidine	Alkaloids	Phenolamine	124-20-9	B	37105000	34069000	32020000	35597000	33409000	32129000	0.255643	0.980047	-0.0290767	insig
pmb2826	C5H8O5	Citramalate	Organic acids	Organic acids	2306-22-1	B	118780	143150	120060	83749	92884	115450	1.13614	0.764635	-0.387156	insig
pme2380	C5H6O5	A-Ketoglutaric acid	Organic acids	Organic acids	328-50-7	B	473020	457270	317210	396630	460010	374810	0.0150586	0.987134	-0.0186818	insig
mws0208	C6H10O4	Adipic Acid*	Organic acids	Organic acids	124-04-9	B	1303200	1198200	916610	933150	814900	760120	1.13872	0.73381	-0.446521	insig
mws0924	C6H10O4	2-Methylglutaric acid*	Organic acids	Organic acids	617-62-9	B	1136900	1128200	810340	833030	740120	650990	1.12992	0.723194	-0.467545	insig
pma6281	C6H10O4	Methylglutaric acid	Organic acids	Organic acids	18069-17-5	B	22220	27865	27967	35704	38670	33751	1.279	1.38529	0.470193	insig
pme0193	C5H10N2O3	L-Glutamine	Amino acids and derivatives	Amino acids and derivatives	56-85-9	A	21919000	25683000	27647000	20844000	17949000	17832000	1.26269	0.752502	-0.410233	insig
pme3146	C5H10N2O3	Ureidoisobutyric acid	Organic acids	Organic acids	2905-86-4	B	37520	47782	61049	70728	57315	53569	0.820811	1.24093	0.311427	insig
pme0026	C6H14N2O2	L-(+)-Lysine	Amino acids and derivatives	Amino acids and derivatives	56-87-1	B	5235100	6471200	7077700	4624300	4424400	4234500	1.29485	0.707155	-0.499902	insig
pme0014	C5H9NO4	L-Glutamic acid*	Amino acids and derivatives	Amino acids and derivatives	56-86-0	A	1456900	1630400	1562000	1207400	1212500	1472000	1.13953	0.837094	-0.256539	insig
mws1050	C5H9NO4	O-Acetylserine*	Amino acids and derivatives	Amino acids and derivatives	5147-00-2	B	970070	1159300	1172300	1119000	1105300	1161400	0.294487	1.02545	0.0362582	insig
pmp001285	C8H4O3	Phthalic anhydride	Phenolic acids	Phenolic acids	85-44-9	A	20899000	18604000	17919000	17208000	16257000	17270000	1.10859	0.883546	-0.178622	insig
mws1024	C9H8O2	p-Coumaraldehyde	Phenolic acids	Phenolic acids	2538-87-6	B	47294	74347	184770	63828	125500	74226	0.0578395	0.860132	-0.21737	insig
mws2213	C9H8O2	Cinnamic acid	Phenolic acids	Phenolic acids	140-10-3	B	4785.6	6882.3	6281.7	3498.9	5940.8	5365	0.69865	0.824793	-0.277896	insig
pme1210	C5H11NO2S	L-Methionine	Amino acids and derivatives	Amino acids and derivatives	63-68-3	B	1984300	1647600	760410	628760	679710	870390	1.04039	0.496062	-1.01141	down
mws0847	C6H7N5	1-Methyladenine	Nucleotides and derivatives	Nucleotides and derivatives	5142-22-3	B	271960	271550	336180	344560	434310	351840	1.13041	1.28535	0.362162	insig
mws0921	C9H10O2	p-Coumaryl alcohol	Phenolic acids	Phenolic acids	3690-05-9	B	51787	62949	176650	58258	109950	71249	0.134546	0.821786	-0.283165	insig
pmf0420	C9H10O2	Benzyl acetate	Organic acids	Organic acids	140-11-4	B	395580	311110	269400	319980	373340	308670	0.216749	1.02653	0.037782	insig
pme1109	C5H5N5O	Guanine*	Nucleotides and derivatives	Nucleotides and derivatives	73-40-5	A	17196000	21786000	26335000	19350000	20742000	17371000	0.602155	0.879756	-0.184825	insig
pme0183	C5H5N5O	2-Hydroxy-6-aminopurine*	Nucleotides and derivatives	Nucleotides and derivatives	3373-53-3	A	6727500	8428500	10102000	9638500	10021000	8108200	0.505311	1.09936	0.136667	insig
pme0256	C5H4N4O2	Xanthine	Nucleotides and derivatives	Nucleotides and derivatives	69-89-6	B	1611200	1346500	728050	694190	563340	501530	1.17347	0.47726	-1.06715	down
mws0182	C8H8O3	p-Hydroxyphenyl acetic acid	Phenolic acids	Phenolic acids	156-38-7	B	64971	77595	70230	126050	130470	97377	1.33261	1.66308	0.733858	insig
mws0145	C8H8O3	2-Methoxybenzoic acid*	Phenolic acids	Phenolic acids	529-75-9	B	338950	174320	174020	353570	328360	614850	1.10028	1.8868	0.915943	insig
mws0458	C8H8O3	Vanillin*	Phenolic acids	Phenolic acids	121-33-5	A	542780	575280	849560	781660	909910	669700	0.734001	1.20006	0.263111	insig
mws0437	C5H12O5	D-Arabitol	Others	Saccharides and Alcohols	488-82-4	A	24205	21248	15500	12797	16372	23508	0.485061	0.864223	-0.210524	insig
mws0183	C7H6O4	Protocatechuic acid*	Flavonoids	Flavanols	99-50-3	B	65812	192420	240480	188930	293890	224960	0.687552	1.41922	0.505094	insig
mws0180	C7H6O4	2,5-Dihydroxybenzoic acid*	Phenolic acids	Phenolic acids	490-79-9	A	15394	67103	129740	144980	122040	111400	0.821041	1.78301	0.834312	insig
mws0639	C7H6O4	2,3-Dihydroxybenzoic Acid*	Organic acids	Organic acids	303-38-8	B	103900	245140	327740	348230	363570	335610	0.879632	1.54764	0.630067	insig
pmb3099	C4H11O4P	Diethyl phosphate	Organic acids	Organic acids	598-02-7	B	2799000	1843500	1241000	1294500	1984600	1419600	0.471535	0.798623	-0.324413	insig
mws0254	C6H9N3O2	L-Histidine	Amino acids and derivatives	Amino acids and derivatives	71-00-1	A	12528000	12167000	6375600	10430000	11245000	11675000	0.358913	1.07336	0.102137	insig
pme2165	C5H4N2O4	Orotic acid	Others	Vitamin	65-86-1	B	292670	354540	420710	178280	193980	173020	1.39271	0.5106	-0.969734	insig
pmf0175	C10H22O	2-Decanol*	Others	Saccharides and Alcohols	1120-06-5	B	25722000	15336000	16501000	23238000	18283000	16495000	0.121039	1.00794	0.0114093	insig
pmf0174	C10H22O	1-Decanol*	Others	Saccharides and Alcohols	112-30-1	B	25222000	15433000	16207000	22851000	18819000	16176000	0.152658	1.01731	0.0247524	insig
pme0128	C6H12N2O3	D-Alanyl-D-Alanine	Amino acids and derivatives	Amino acids and derivatives	923-16-0	B	38350	36774	41124	14964	24055	30981	1.13962	0.602161	-0.731779	insig
mws0005	C10H12N2	Tryptamine	Alkaloids	Plumerane	61-54-1	B	13145000	14278000	19688000	25486000	16874000	23789000	1.01351	1.40411	0.489655	insig
pme0543	C9H7NO2	Indole-5-carboxylic acid	Alkaloids	Plumerane	1670-81-1	B	970650	1180500	1217200	1710200	2127900	1984500	1.37179	1.72862	0.789621	insig
mws1550	C6H11NO2S	S-Allyl-L-cysteine	Amino acids and derivatives	Amino acids and derivatives	21593-77-1	B	306470	332260	260200	130510	140530	178650	1.38269	0.50025	-0.999278	insig
pmb0449	C6H11NO4	2-Aminoadipic acid (L-Homoglutamic acid)*	Amino acids and derivatives	Amino acids and derivatives	542-32-5	B	1264600	1243000	1491100	2165300	2009500	2198300	1.41299	1.59379	0.672464	insig
pme3382	C6H11NO4	N-Acetylthreonine*	Amino acids and derivatives	Amino acids and derivatives	17093-74-2	B	94874	104600	103430	100500	88065	94203	0.86154	0.933523	-0.0992418	insig
pme2914	C6H10O5	3-Hydroxy-3-methylpentane-1,5-dioic acid	Amino acids and derivatives	Amino acids and derivatives	503-49-1	B	1432800	1321300	1355800	1298200	1381700	1422600	0.00269001	0.998199	-0.00259996	insig
pmf0440	C10H10O2	4-MethoxycinnaMaldehyde	Phenolic acids	Phenolic acids	1963-36-6	B	1015400	806380	729340	732360	813410	755690	0.588333	0.902137	-0.148581	insig
pme3030	C5H9NO3S	N-Acetylcysteine	Amino acids and derivatives	Amino acids and derivatives	616-91-1	B	481370	749930	1594800	1767800	817510	597240	0.190925	1.12613	0.171371	insig
pme2758	C5H9NO5	4-Hydroxy-L-glutamic acid	Amino acids and derivatives	Amino acids and derivatives	3913-68-6	B	14707	18122	16359	19412	15337	7836.3	0.535965	0.865766	-0.207951	insig
mws0159	C9H8O3	Phenylpyruvic acid	Organic acids	Organic acids	156-06-9	B	9	9	9	221610	177070	172090	1.46063	21139.6	14.3677	up
Lmlp002133	C9H8O3	trans-p-Hydroxycinnamic acid	Phenolic acids	Phenolic acids	-	B	881640	1062900	2381700	1218600	1816400	1343400	0.208016	1.01206	0.0172901	insig
pme1439	C9H8O3	p-Coumaric acid	Phenolic acids	Phenolic acids	501-98-4	A	3983300	4901500	10336000	5694200	8449500	5549900	0.204621	1.0246	0.0350585	insig
pme1419	C6H14ClNO2S	L-Methionine methyl ester	Amino acids and derivatives	Amino acids and derivatives	2491-18-1	B	340830	240850	98029	113580	135830	188730	0.560399	0.644599	-0.633525	insig
pme3085	C8H7NO3	2-(Formylamino)benzoic acid	Organic acids	Organic acids	3342-77-6	B	319650	390960	856970	546130	652990	558760	0.465275	1.1214	0.165298	insig
pme2617	C5H11NO3S	Methionine sulfoxide	Amino acids and derivatives	Amino acids and derivatives	62697-73-8	B	4204300	4097000	3972100	2890400	2741400	2597900	1.44021	0.670531	-0.576623	insig
pme3968	C6H7N5O	7-Methylguanine	Nucleotides and derivatives	Nucleotides and derivatives	578-76-7	B	405280	335130	448010	353860	509800	356400	0.102837	1.02662	0.0379073	insig
pme0021	C9H11NO2	L-Phenylalanine	Amino acids and derivatives	Amino acids and derivatives	63-91-2	A	1465700	1404200	1229500	1598100	1416200	1525100	0.926419	1.10733	0.147089	insig
pme0281	C8H6O4	Terephthalic acid*	Phenolic acids	Phenolic acids	100-21-0	B	3831500	3138000	3365000	2578700	3175500	2605000	1.10549	0.808864	-0.306032	insig
pme0282	C8H6O4	Phthalic acid*	Organic acids	Organic acids	88-99-3	A	178020	154770	152890	125980	118130	118300	1.36235	0.746191	-0.422383	insig
pmc0274	C6H6N4S	6-Methylmercaptopurine	Nucleotides and derivatives	Nucleotides and derivatives	50-66-8	B	6975600	6746200	6037300	7914000	6888400	7727800	1.07384	1.14024	0.189343	insig
mws0344	C5H10O6	D-Xylonic acid	Organic acids	Organic acids	526-91-0	B	2731100	2665900	2645400	2888300	2763600	2644300	0.711453	1.03156	0.0448246	insig
pme1266	C6H6N4O2	3-Methylxanthine*	Nucleotides and derivatives	Nucleotides and derivatives	1076-22-8	B	211680	296170	319440	123490	117210	124540	1.40044	0.44149	-1.17955	down
pme2801	C6H6N4O2	7-Methylxanthine*	Nucleotides and derivatives	Nucleotides and derivatives	552-62-5	B	86953	66450	291730	59419	117220	111320	0.347271	0.646906	-0.628373	insig
mws0274	C9H10O3	Phenyllactate(PLA)	Organic acids	Organic acids	828-01-3	B	21973	34021	23867	46133	38144	40379	1.21262	1.56091	0.642389	insig
pmn001681	C10H14O2	1-(4-Methoxyphenyl)-1-propanol	Phenolic acids	Phenolic acids	5349-60-0	B	50953	43582	35753	47338	57682	35520	0.269687	1.07869	0.109277	insig
Hmbp001276	C8H8O4	Gallacetophenone*	Others	Others	528-21-2	B	1564600	1638500	1636500	2786500	2613900	2798500	1.45229	1.69413	0.760543	insig
mws0028	C8H8O4	Vanillic acid	Phenolic acids	Phenolic acids	121-34-6	A	645100	828100	816410	766680	941480	769530	0.488505	1.08214	0.113894	insig
pme2598	C8H8O4	3,4-Dihydroxybenzeneacetic acid*	Organic acids	Organic acids	102-32-9	B	1037600	1193700	746450	678650	865050	954730	0.645945	0.839033	-0.253201	insig
pme1383	C8H11NO3	Pyridoxine	Others	Vitamin	65-23-6	B	1638400	1346100	559620	1496400	2640400	2919700	1.01235	1.99104	0.993525	insig
pme0181	C7H11N3O2	1-Methylhistidine	Amino acids and derivatives	Amino acids and derivatives	332-80-9	B	1733200	1779800	1741800	1473300	1486900	1474000	1.45802	0.843838	-0.244962	insig
pme1162	C7H6O5	Gallic acid	Organic acids	Organic acids	149-91-7	B	143980	149680	124140	97940	91879	123390	1.17993	0.749663	-0.415687	insig
pme0253	C8H15NO3	N-Acetyl-L-leucine	Amino acids and derivatives	Amino acids and derivatives	1188-21-2	B	139650	178060	259670	278050	281620	227760	0.951205	1.3638	0.447631	insig
pme2853	C8H15NO3	Hexanoyl glycine	Amino acids and derivatives	Amino acids and derivatives	24003-67-6	B	40771	51524	21434	21762	15833	20316	1.09579	0.509202	-0.973691	insig
pme3009	C6H6O6	Trans-Citridic acid	Organic acids	Organic acids	4023-65-8	B	894750	809020	954830	891300	854250	946470	0.214658	1.01257	0.0180224	insig
mws0154	C7H10O5	Shikimic acid	Organic acids	Organic acids	138-59-0	A	388400	387480	280890	210090	204060	219030	1.34035	0.599165	-0.738974	insig
mws0242	C8H14O4	SubericAcid	Organic acids	Organic acids	505-48-6	B	554190	540780	485990	363960	428860	356560	1.33956	0.727014	-0.459945	insig
mws0260	C6H14N4O2	L-(+)-Arginine	Amino acids and derivatives	Amino acids and derivatives	74-79-3	A	43749000	76951000	81717000	39923000	37598000	35716000	1.1951	0.559424	-0.837985	insig
mws1208	C10H22O2	1,10-Decanediol	Others	Saccharides and Alcohols	112-47-0	B	535110	382680	160940	284630	422950	453320	0.31854	1.07617	0.10591	insig
pmf0173	C10H22O2	1,2-Decanediol	Others	Saccharides and Alcohols	1119-86-4	B	431070	452950	452250	409680	348760	447860	0.845615	0.902737	-0.147623	insig
pme2559	C6H9NO5	N-Acetylaspartate	Amino acids and derivatives	Amino acids and derivatives	997-55-7	B	326630	291270	291940	254340	242020	252260	1.33234	0.822804	-0.281379	insig
pmb0312	C10H9NO2	5-methoxyindole-3-carbaldehyde	Alkaloids	Plumerane	10601-19-1	B	112130	95757	115270	134180	101590	129970	0.747247	1.13177	0.178583	insig
pme0008	C6H13N3O3	L-Citrulline	Amino acids and derivatives	Amino acids and derivatives	372-75-8	B	1507700	2146800	1606100	1018300	950910	865940	1.37836	0.53894	-0.891802	insig
pme2024	C10H12N2O	Serotonin	Alkaloids	Plumerane	50-67-9	A	6273400	6219000	4247800	9977800	7406600	8048400	1.17397	1.51927	0.603374	insig
pmb0468	C6H11NO3S	N-formylmethionine	Amino acids and derivatives	Amino acids and derivatives	4289-98-9	B	10915000	9856900	7319400	18690000	12698000	12894000	1.15637	1.57636	0.656597	insig
mws1200	C10H10O3	Trans-4-Hydroxycinnamic Acid Methyl Ester*	Phenolic acids	Phenolic acids	19367-38-5	A	2975800	2879600	2680900	1875200	3320800	2603300	0.475607	0.913663	-0.130266	insig
mws1195	C10H10O3	Methyl p-coumarate*	Phenolic acids	Phenolic acids	3943-97-3	A	5829000	5803200	5587900	3849200	6580400	5262200	0.51103	0.911249	-0.134083	insig
mws0009	C10H10O3	Coniferaldehyde	Phenolic acids	Phenolic acids	20649-42-7	B	118010	184470	507500	157310	257970	168910	0.258441	0.72124	-0.471449	insig
mws0981	C6H5N5O2	Isoxanthopterin	Nucleotides and derivatives	Nucleotides and derivatives	529-69-1	B	37512	41108	26263	22401	48564	26282	0.318118	0.927195	-0.109055	insig
pmn001682	C9H8O4	Sorbic acid*	Phenolic acids	Phenolic acids	110-44-1	B	494990	600190	510590	58569	56894	67802	1.45855	0.114129	-3.13126	down
mws2212	C9H8O4	Caffeic acid*	Phenolic acids	Phenolic acids	331-39-5	B	828190	930140	989130	421220	352410	342580	1.44072	0.40627	-1.29949	down
pmf0138	C6H12O6	D-(+)-Mannose*	Others	Saccharides and Alcohols	3458-28-4	B	1363600	1443700	1114300	1808200	1348000	1351900	0.682096	1.14956	0.201077	insig
pmf0139	C6H12O6	D-(+)-Galactose*	Others	Saccharides and Alcohols	59-23-4	B	1157000	1082700	861750	1423900	1059800	1133900	0.75846	1.16642	0.22209	insig
mws0198	C6H12O6	D-(+)-Glucose*	Others	Saccharides and Alcohols	50-99-7	A	655950	576820	522560	694670	535500	650350	0.473351	1.07132	0.0993894	insig
pme0516	C6H12O6	Inositol*	Others	Saccharides and Alcohols	87-89-8	B	223780	243670	246800	165800	193010	211770	1.20924	0.798852	-0.324	insig
mws0663	C7H8N4O2	1,7-Dimethylxanthine	Nucleotides and derivatives	Nucleotides and derivatives	611-59-6	B	196270	227750	87120	99143	65127	46126	1.11609	0.411621	-1.28061	down
mws0093	C10H12O3	Coniferyl alcohol	Phenolic acids	Phenolic acids	458-35-5	B	20197	60262	405840	108860	266980	115220	0.465937	1.00979	0.0140557	insig
mws0250	C9H11NO3	L-(-)-Tyrosine	Amino acids and derivatives	Amino acids and derivatives	60-18-4	A	7030100	6856800	6341600	7299400	6051100	6777800	0.0760456	0.995047	-0.00716401	insig
mws1350	C9H10O4	Syringic Aldehyde	Phenolic acids	Phenolic acids	134-96-3	A	783080	982910	2308500	1141800	1643000	1182600	0.149621	0.973717	-0.0384256	insig
mws0328	C9H10O4	DL-P-hydroxyphenyllactic acid	Organic acids	Organic acids	6482-9-80	B	52388	69951	59380	37678	49168	49628	1.12573	0.751017	-0.413083	insig
pme2237	C6H14O6	Dulcitol*	Others	Saccharides and Alcohols	608-66-2	A	86720	94063	120570	396920	303690	455850	1.42534	3.83756	1.94019	up
mws1155	C6H14O6	Mannitol*	Others	Saccharides and Alcohols	87-78-5	A	26550	36408	38842	88664	78516	101310	1.40075	2.63743	1.39913	up
mws0214	C6H14O6	D-Sorbitol*	Others	Saccharides and Alcohols	50-70-4	A	52234	80372	53103	289560	213450	314440	1.41236	4.40178	2.13809	up
pme2596	C8H9NO4	4-Pyridoxic acid	Others	Vitamin	82-82-6	B	620340	554530	392550	678000	827180	838610	1.17826	1.49532	0.580452	insig
pme2602	C3H8NO6P	O-Phospho-L-serine	Amino acids and derivatives	Amino acids and derivatives	407-41-0	B	56635	76060	73994	86949	66248	94431	0.761346	1.19807	0.260713	insig
pme0137	C7H12N2O4	N-α-Acetyl-L-glutamine	Amino acids and derivatives	Amino acids and derivatives	2490-97-3	B	232060	263520	261510	383880	272560	260820	0.814185	1.21156	0.276866	insig
pmn001590	C9H16O4	Azelaic acid	Lipids	Free fatty acids	123-99-9	A	85650	92372	71517	117970	123990	112470	1.31964	1.42034	0.506235	insig
pme0122	C8H16N2O3	N6-Acetyl-L-lysine	Amino acids and derivatives	Amino acids and derivatives	692-04-6	B	2897600	2761200	2748300	3757800	3305100	3790000	1.37619	1.29092	0.3684	insig
mws0736	C8H16N2O3	N-Glycyl-L-leucine*	Amino acids and derivatives	Amino acids and derivatives	869-19-2	A	7724500	7630200	4909900	5529000	4980700	5243900	0.890153	0.777395	-0.36328	insig
mws5041	C8H16N2O3	Glycylisoleucine*	Amino acids and derivatives	Amino acids and derivatives	19461-38-2	B	4551500	4477400	2901600	3376100	2986700	3116800	0.838304	0.794569	-0.331756	insig
pme3388	C7H16N4O2	H-HomoArg-OH	Amino acids and derivatives	Amino acids and derivatives	156-86-5	A	1868800	1854200	1745800	1438000	1281800	1319400	1.41222	0.73859	-0.437155	insig
pmf0348	C10H20O3	2,6-Dimethyl-7-octene-2,3,6-triol	Others	Saccharides and Alcohols	73815-21-1	B	19636000	17389000	9403200	16125000	20594000	19805000	0.651667	1.21745	0.283862	insig
pme0076	C7H11NO5	N-Acetyl-L-glutamic acid	Amino acids and derivatives	Amino acids and derivatives	1188-37-0	B	1529000	1678400	1610200	1698400	1590300	1523000	0.0649117	0.998775	-0.00176792	insig
mws0193	C7H15N3O3	L-Homocitrulline	Amino acids and derivatives	Amino acids and derivatives	1190-49-4	B	233230	276980	223450	234960	271930	299140	0.623546	1.09864	0.135722	insig
pme0278	C7H14N2O4	2,6-Diaminooimelic acid	Amino acids and derivatives	Amino acids and derivatives	583-93-7	B	1273300	1181300	1370200	1714500	1235800	1563500	0.88507	1.18014	0.238958	insig
pmb2561	C7H13NO3S	N-Acetylmethionine	Amino acids and derivatives	Amino acids and derivatives	65-82-7	B	51378	29706	6824.1	9	9	18005	1.02581	0.205021	-2.28616	down
mws0281	C6H8O7	Citric Acid	Organic acids	Organic acids	77-92-9	A	2720600	3065500	2658100	2338900	2172400	2342000	1.32571	0.811598	-0.301162	insig
pme2993	C10H8O4	Scopoletin(7-Hydroxy-5-methoxycoumarin)	Lignans and Coumarins	Coumarins	92-61-5	B	526240	660690	599960	505030	534010	531760	1.0161	0.879069	-0.185951	insig
mws0277	C7H12O6	Kinic acid	Organic acids	Organic acids	77-95-2	A	7798800	7353000	7133000	4780200	4342800	4009300	1.42836	0.589294	-0.76294	insig
pme3705	C6H10O7	D-Glucoronic acid*	Others	Saccharides and Alcohols	6556-12-3	A	204230	271940	162920	204930	180630	222680	0.164493	0.951728	-0.0713784	insig
mws1213	C6H10O7	Aldehydo-D-galacturonate*	Organic acids	Organic acids	685-73-4	A	207450	267400	220390	249100	206600	253080	0.125084	1.01948	0.0278268	insig
mws0014	C10H10O4	Ferulic acid	Phenolic acids	Phenolic acids	1135-24-6	A	2736500	4531800	9905500	7393200	11044000	7394400	0.800161	1.50413	0.588928	insig
pmb0423	C10H10O4	Hydroxy-methoxycinnamate	Phenolic acids	Phenolic acids	-	A	684970	628720	616280	710990	766260	797060	1.28463	1.17842	0.23685	insig
mws2218	C8H10N4O2	Caffeine	Alkaloids	Alkaloids	58-08-2	B	630570	353070	240820	66058	197860	69315	1.21177	0.272147	-1.87754	down
pme0534	C6H12O7	Gluconic acid	Others	Saccharides and Alcohols	526-95-4	A	621640	634270	646530	695880	652320	686500	1.20777	1.06952	0.0969651	insig
pme3827	C9H11NO4	3,4-Dihydroxy-DL-phenylalanine	Amino acids and derivatives	Amino acids and derivatives	63-84-3	B	340490	299250	338030	548840	388500	480220	1.26327	1.44979	0.535843	insig
mws0027	C9H10O5	Syringic acid	Phenolic acids	Phenolic acids	530-57-4	B	285650	441100	813800	737930	1104500	719280	0.947539	1.66285	0.733662	insig
pmb2640	C12H24O2	Lauric acid	Lipids	Free fatty acids	143-07-7	B	62679	81934	72388	64044	55325	48710	1.13159	0.774554	-0.368562	insig
pme0266	C10H18O4	Sebacate	Organic acids	Organic acids	111-20-6	A	11700	11259	8759.9	8162.8	8364.1	7963.3	1.18127	0.772101	-0.373138	insig
mws5037	C9H18N2O3	Alanylleucine	Amino acids and derivatives	Amino acids and derivatives	1999-42-4	B	1610100	1216000	658380	750100	893720	896840	0.613884	0.729136	-0.45574	insig
mws0018	C10H26N4	Spermine	Alkaloids	Phenolamine	71-44-3	B	11473000	12035000	13077000	12293000	13338000	12657000	0.659458	1.04655	0.06564	insig
mws0282	C11H12N2O2	L-Tryptophan	Amino acids and derivatives	Amino acids and derivatives	73-22-3	A	22843000	22552000	17197000	16808000	13589000	15921000	1.16524	0.739999	-0.434405	insig
pmb0818	C11H11NO3	Methoxyindoleacetic acid	Alkaloids	Plumerane	3471-31-6	B	19988000	21017000	15757000	16231000	13286000	16157000	1.01969	0.804658	-0.313552	insig
pme1261	C9H19NO4	Pantothenol	Others	Saccharides and Alcohols	16485-10-2	B	7053300	6252800	6514000	2991900	2298800	2121600	1.42566	0.373979	-1.41897	down
mws1014	C10H8O5	Fraxetin	Lignans and Coumarins	Coumarins	574-84-5	B	2543700	2950000	2511200	2913100	2706300	2761600	0.53948	1.04698	0.066239	insig
pme3443	C11H12O4	Sinapinaldehyde	Phenolic acids	Phenolic acids	4206-58-0	A	2088300	3700300	9569400	4281700	5230700	3582800	0.0302736	0.852663	-0.229952	insig
mws1212	C11H12O4	Methyl ferulate	Phenolic acids	Phenolic acids	2309-07-1	B	10347000	8884100	7012600	3340500	4041800	3732000	1.39801	0.423504	-1.23955	down
pmb2620	C11H12O4	3,4-Dimethoxycinnamic acid	Phenolic acids	Phenolic acids	14737-89-4	B	1826400	1540600	1167300	560600	658160	714680	1.37254	0.426403	-1.22971	down
pme0109	C10H13NO4	(-)-3-(3,4-Dihydroxyphenyl)-2-methylalanine	Amino acids and derivatives	Amino acids and derivatives	555-30-6	B	527020	555110	539230	661340	597080	865310	1.11076	1.30984	0.389396	insig
pmb2507	C5H11O7P	2-Deoxyribose 1-phosphate	Others	Others	17210-42-3	B	285200	301240	321270	599610	718750	689570	1.44108	2.21208	1.14541	up
pmb2873	C13H13NO2	3-(2-Naphthyl)-D-alanine	Amino acids and derivatives	Amino acids and derivatives	-	B	920620	823970	728680	845360	669740	720520	0.671411	0.903913	-0.145745	insig
pme0170	C8H16N4O3	N-α-Acetyl-L-arginine	Amino acids and derivatives	Amino acids and derivatives	155-84-0	B	439730	479860	504050	432880	358720	449100	0.963934	0.871498	-0.19843	insig
mws5045	C12H24O3	12-Hydroxydodecanoic acid	Lipids	Free fatty acids	505-95-3	B	14793	13662	11767	12914	13252	10549	0.623517	0.912809	-0.131615	insig
pme2566	C8H14N2O5	(5-L-Glutamyl)-L-amino acid	Amino acids and derivatives	Amino acids and derivatives	5875-41-2	B	921340	1115100	1091500	18393	14899	30352	1.45135	0.0203469	-5.61904	down
mws1337	C9H17NO5	D-Pantothenic Acid	Others	Vitamin	79-83-4	A	12275000	9982600	11701000	9950100	9187800	10043000	1.04237	0.859308	-0.218753	insig
pme1228	C11H12N2O3	5-Hydroxy-L-tryptophan	Amino acids and derivatives	Amino acids and derivatives	56-69-9	B	1748900	2641000	3232300	2390200	1544900	1393000	0.877038	0.699024	-0.516586	insig
pme2755	C8H15NO6	N-Acetyl-D-glucosamine	Others	Saccharides and Alcohols	7512-17-6	B	5550600	6445600	4911300	5389600	4741400	6343200	0.178836	0.974372	-0.0374549	insig
mws5042	C11H14N2O3	Glycylphenylalanine	Amino acids and derivatives	Amino acids and derivatives	721-66-4	B	6583000	6834800	4142500	4405900	4184700	4096500	1.00177	0.722488	-0.468955	insig
Hmgp005956	C13H18O3	dehydrovomifoliol	Terpenoids	Sesquiterpenoids	15764-81-5	B	1358100	916620	952260	880680	1072800	704800	0.691174	0.823767	-0.279692	insig
Hmcp003852	C15H26O	Elemol	Others	Others	639-99-6	B	29021000	23064000	20490000	22940000	24672000	19944000	0.371042	0.930844	-0.103389	insig
mws0520	C11H13NO4	N-Acetyl-L-tyrosine	Amino acids and derivatives	Amino acids and derivatives	537-55-3	B	147780	188060	252600	125650	140190	110260	1.1564	0.639148	-0.645779	insig
mws4085	C11H12O5	Sinapic acid	Phenolic acids	Phenolic acids	530-59-6	B	9	14377	52851	75293	89671	28441	0.747576	2.87647	1.5243	insig
pmb2643	C14H26O2	Myristoleic acid	Lipids	Free fatty acids	544-64-9	B	74486	90464	59044	53601	52637	58179	1.12147	0.734024	-0.446101	insig
pme1194	C9H13N3O4	Deoxycytidine	Nucleotides and derivatives	Nucleotides and derivatives	951-77-9	B	5004300	4177500	1306200	1755200	2715200	2379200	0.462382	0.653089	-0.614648	insig
mws0119	C14H28O2	Myristic Acid	Lipids	Free fatty acids	544-63-8	B	47039000	48423000	43923000	49944000	46169000	41492000	0.199267	0.98723	-0.0185424	insig
mws0474	C12H22O4	Dodecanedioic aicd	Organic acids	Organic acids	693-23-2	B	2605.7	3749.4	2787.2	2573.3	2862.8	2988.7	0.448934	0.921519	-0.117915	insig
pmb0490	C13H18N2O2	N-p-Coumaroyl putrescine	Alkaloids	Phenolamine	34136-53-3	A	1749200	1804800	1669300	1627300	1581100	1765100	0.769827	0.952176	-0.0707001	insig
pmb0962	C10H22N2O4	Lysine butyrate	Amino acids and derivatives	Amino acids and derivatives	80407-71-2	B	131370	152650	103670	197670	159240	246110	1.15483	1.55542	0.637302	insig
pmp000254	C13H16O4	Z-6-Hydroxy-7-methoxydihydroligustilide	Others	Others	-	B	361770	357310	328200	371420	315540	286440	0.640114	0.929455	-0.105543	insig
mws4176	C12H16N2O3	DL-Alanyl-DL-phenylalanine	Amino acids and derivatives	Amino acids and derivatives	1999-45-7	A	903530	1139600	704870	955200	923630	1004400	0.311337	1.04921	0.0693039	insig
Lmhn003240	C11H10O6	benzoylmalic acid	Phenolic acids	Phenolic acids	-	A	1285700	1008000	779270	6832700	5978900	5156800	1.43744	5.84724	2.54776	up
pmn001669	C12H14O5	Methyl sinapate	Phenolic acids	Phenolic acids	20733-94-2	B	22995	30648	32884	87452	78711	79427	1.42132	2.8383	1.50503	up
pmn001320	C12H14O5	1-O-p-Cumaroylglycerol	Phenolic acids	Phenolic acids	106055-11-2	A	1161400	1210100	1834500	3920400	4952200	3669100	1.39402	2.98186	1.57621	up
pme2827	C16H32O	Palmitaldehyde	Lipids	Free fatty acids	629-80-1	B	36143000	29140000	23097000	30922000	33031000	26571000	0.189111	1.02426	0.0345804	insig
mws1383	C12H10N4O2	Lumichrome	Alkaloids	Alkaloids	1086-80-2	A	3815500	3374900	2997600	4283800	3465600	3680300	0.775646	1.12188	0.165917	insig
pme0264	C10H14N2O5	Thymidine	Nucleotides and derivatives	Nucleotides and derivatives	50-89-5	B	1530700	1392100	614490	976580	1395600	1230700	0.191407	1.01854	0.0265061	insig
pme3732	C9H13N3O5	Cytidine	Nucleotides and derivatives	Nucleotides and derivatives	65-46-3	B	4544000	4704100	2540400	2757500	2677000	3214700	0.812227	0.733698	-0.446742	insig
mws0976	C9H12N2O6	β-Pseudouridine*	Nucleotides and derivatives	Nucleotides and derivatives	1445-07-4	B	544410	564390	459090	450530	461430	515680	0.755814	0.910549	-0.135192	insig
mws0248	C9H12N2O6	Uridine*	Nucleotides and derivatives	Nucleotides and derivatives	58-96-8	A	2657900	2793600	1654800	1493900	1928600	1875200	0.874291	0.745493	-0.423732	insig
pme2266	C10H16N2O3S	Biotin	Others	Vitamin	58-85-5	B	151430	147700	99472	59963	80183	103110	1.12032	0.610273	-0.712474	insig
pmb2591	C13H14N2O3	Acetyltryptophan	Amino acids and derivatives	Amino acids and derivatives	2280-01-5	A	103780	101400	80661	72541	69195	98319	0.797721	0.83982	-0.251848	insig
mws0655	C8H10NO6P	Pyridoxal 5'-phosphate	Others	Vitamin	54-47-7	B	16622	15475	21427	16342	13511	10938	0.978934	0.762107	-0.391935	insig
pme3961	C10H13N5O3	Deoxyadenosine	Nucleotides and derivatives	Nucleotides and derivatives	958-09-8	A	11877000	18363000	9079300	5500300	9388700	6056600	1.13045	0.532705	-0.90859	insig
pme2776	C10H12N4O4	2'-Deoxyinosine	Nucleotides and derivatives	Nucleotides and derivatives	890-38-0	B	530970	775700	458530	292620	432990	259150	1.18702	0.557874	-0.841988	insig
Lmhn003373	C11H10O7	p-Hydroxybenzoylmalic acid	Phenolic acids	Phenolic acids	-	B	64803	56088	41043	114900	115420	106700	1.37326	2.08122	1.05743	up
pmn001611	C16H30O2	Palmitoleic acid	Lipids	Free fatty acids	373-49-9	A	33564000	42727000	30940000	27034000	26676000	25822000	1.23235	0.741689	-0.431115	insig
pma3101	C11H14NO6+	Nicotinate ribonucleoside	Others	Vitamin	17720-18-2	B	13208000	11706000	10082000	12562000	10677000	11728000	0.0374408	0.999171	-0.00119601	insig
pmn001578	C16H32O2	Hexadecanoic acid	Lipids	Free fatty acids	57-10-3	A	20353000	21500000	23000000	21846000	22999000	21720000	0.453068	1.0264	0.0375905	insig
pme1187	C10H14N2O6	5-Methyluridine	Nucleotides and derivatives	Nucleotides and derivatives	1463-10-1	B	17782	17524	12637	13817	11204	18218	0.423772	0.901883	-0.148987	insig
mws0866	C6H13O9P	D-Glucose 6-phosphate*	Others	Saccharides and Alcohols	56-73-5	A	5948500	6682200	5673600	8873900	7445600	7201900	1.20854	1.28502	0.361791	insig
pme3313	C6H13O9P	D-Fructose 6-phosphate*	Others	Saccharides and Alcohols	643-13-0	B	1557100	1973000	1871800	2481400	2067400	2127900	1.08729	1.23599	0.305668	insig
mws1090	C6H13O9P	Glucose-1-phosphate*	Others	Saccharides and Alcohols	59-56-3	A	5498200	6472300	6654400	8686300	7935900	6457000	1.00716	1.23916	0.309361	insig
pmb0952	C12H16N4OS	Thiamine	Others	Vitamin	67-03-8	B	458170	572330	566390	225890	125620	280020	1.29903	0.395475	-1.33834	down
mws0715	C13H16N2O4	Phenylacetyl-L-glutamine	Amino acids and derivatives	Amino acids and derivatives	28047-15-6	B	41492	42559	20866	28572	35284	17978	0.541752	0.779988	-0.358476	insig
pmb0896	C14H20N2O3	N'-Feruloyl putrescine	Alkaloids	Phenolamine	-	A	3922900	3869900	3899600	3768800	3437600	3779500	1.02576	0.939576	-0.089918	insig
pme1184	C10H13N5O4	Deoxyguanosine*	Nucleotides and derivatives	Nucleotides and derivatives	961-07-9	B	2030000	2430400	1046100	1225700	1700000	1288500	0.553736	0.765314	-0.385877	insig
pme0230	C10H13N5O4	Adenosine*	Nucleotides and derivatives	Nucleotides and derivatives	58-61-7	A	4343200	6359500	5802800	3087600	4047300	2885300	1.26128	0.607082	-0.720036	insig
pme2890	C8H16N2O4S2	L-Homocystine	Amino acids and derivatives	Amino acids and derivatives	626-72-2	B	202510	214370	117750	114300	112100	156230	0.849459	0.715691	-0.482591	insig
mws0268	C10H12N4O5	Inosine	Nucleotides and derivatives	Nucleotides and derivatives	58-63-9	B	83735	55687	25933	19095	23583	13344	1.16131	0.338798	-1.5615	down
mws1060	C10H12N4O5	9-(β-D-Arabinofuranosyl)hypoxanthine	Nucleotides and derivatives	Nucleotides and derivatives	7013-16-3	A	5199400	4062300	2482100	756240	1123600	990240	1.37278	0.244391	-2.03274	down
pmp000087	C13H16O6	2-Feruloyl-sn-glycerol*	Phenolic acids	Phenolic acids	-	B	370050	468290	453960	289250	456310	291390	0.867246	0.802407	-0.317595	insig
pmp000086	C13H16O6	1-Feruloyl-sn-glycerol*	Phenolic acids	Phenolic acids	-	B	3951900	4860200	8464100	7010400	8447900	6183600	0.698432	1.2527	0.325041	insig
mws1297	C13H18O6	Benzyl β-D-Glucopyranoside	Phenolic acids	Phenolic acids	4304-12-5	B	57921	46251	44385	75195	65800	67453	1.29951	1.40315	0.488671	insig
pmp001264	C16H35NO2	Hexadecylsphingosine	Lipids	Sphingolipids	-	A	59721000	45314000	35993000	42450000	45077000	56484000	0.171942	1.02115	0.0301974	insig
pmb0508	C14H20N4O2	N-p-Coumaroyl agmatine	Alkaloids	Phenolamine	7295-86-5	A	1177500	1146900	924740	716370	614330	687420	1.36651	0.621124	-0.687046	insig
YC512117	C18H28O2	Octadecatetraenoic acid	Lipids	Free fatty acids	20290-75-9	B	21766	17645	23496	31241	27293	26880	1.25076	1.35778	0.441252	insig
mws1038	C11H22N2O4S	(R)-Pantetheine	Others	Others	496-65-1	A	227660	248280	181290	40856	52766	45929	1.44641	0.212332	-2.23561	down
mws5035	C15H22N2O3	Leucylphenylalanine	Amino acids and derivatives	Amino acids and derivatives	56217-82-4	B	286940	265390	113350	82046	127170	223870	0.671663	0.650592	-0.620175	insig
mws0367	C18H30O2	α-Linolenic Acid	Lipids	Free fatty acids	463-40-1	A	73162	74714	64301	77602	78571	79391	1.08472	1.11022	0.150851	insig
pmb0889	C18H30O2	Punicic acid	Lipids	Free fatty acids	544-72-9	A	501820	572350	553890	695840	619500	499530	0.60683	1.11474	0.156712	insig
pmb1650	C18H30O2	Octadeca-11E,13E,15Z-trienoic acid	Lipids	Free fatty acids	25575-00-2	B	12620000	10895000	10296000	9562800	9914200	10271000	0.998036	0.879832	-0.1847	insig
Lmhn002926	C13H12O7	p-coumaroylmalic acid	Phenolic acids	Phenolic acids	-	A	9	9	9	5768700	4592100	5711700	1.46097	595278	19.1832	up
mws0629	C13H16N2O5	Asp-phe	Amino acids and derivatives	Amino acids and derivatives	13433-09-5	B	510720	567060	357700	423540	406870	476040	0.383692	0.910114	-0.135881	insig
pmp001245	C15H22NO4+	Feruloylcholine	Alkaloids	Alkaloids	85927-25-9	B	47148000	45951000	50483000	280240	359720	592480	1.45315	0.00858353	-6.86421	down
mws1491	C18H32O2	Linoleic acid	Lipids	Free fatty acids	60-33-3	B	441460	396190	304990	344830	416870	408630	0.193417	1.02423	0.0345444	insig
YC512118	C18H35NO	Octadecenoic amide	Others	Others	-	A	1177400	1018000	1389100	1799200	2001000	1278000	1.05574	1.41671	0.502545	insig
mws1490	C18H34O2	Oleic Acid	Lipids	Free fatty acids	112-80-1	B	903370	778290	776210	630290	1019200	756410	0.180598	0.978856	-0.0308319	insig
mws0396	C18H34O2	Elaidic Acid	Lipids	Free fatty acids	112-79-8	A	972160	1277600	1403000	1103500	816100	1013300	0.89715	0.802927	-0.316659	insig
pme1178	C10H13N5O5	Guanosine	Nucleotides and derivatives	Nucleotides and derivatives	118-00-3	A	15282000	19487000	19484000	10096000	12261000	8269800	1.33012	0.564518	-0.824908	insig
pmp000460	C17H17NO3	N-cis-Paprazine	Alkaloids	Phenolamine	-	A	43688	767640	109670	258270	410060	572270	0.651329	1.34702	0.429768	insig
Lmhn002423	C12H12O8	vnilloylmalic acid	Phenolic acids	Phenolic acids	-	A	176790	202770	157420	576250	410260	364120	1.3742	2.51523	1.33069	up
mws0668	C10H12N4O6	Xanthosine	Nucleotides and derivatives	Nucleotides and derivatives	146-80-5	A	1691900	1202600	675700	905310	1009900	1004700	0.342567	0.817856	-0.290081	insig
mws1489	C18H36O2	Stearic Acid	Lipids	Free fatty acids	57-11-4	B	3441900	3835500	4215400	3836200	3405300	3541100	0.615543	0.938205	-0.0920252	insig
pma1751	C12H15NO7	Nicotinic acid-hexoside	Others	Vitamin	-	B	6908400	7745000	5716600	6212300	6474200	7887300	0.0690964	1.01	0.0143623	insig
pmp001269	C18H39NO	Hexadecyl ethanolamine	Others	Others	-	B	884290	1424800	1257800	720410	974190	1087500	0.813228	0.779979	-0.358492	insig
pme3279	C15H10O6	2'-Hydroxygenistein	Flavonoids	Isoflavones	1156-78-1	B	587180	515420	269540	227970	132930	149850	1.25137	0.372229	-1.42574	down
mws1521	C13H18O7	Salicin	Phenolic acids	Phenolic acids	138-52-3	B	39434	34720	23200	30962	29390	22397	0.538599	0.84998	-0.234498	insig
mws1436	C18H38O2	1,18-Octadecanediol	Lipids	Free fatty acids	3155-43-9	B	28826	27978	34018	94661	56200	50665	1.28741	2.21891	1.14985	up
pmb3081	C6H11PO11	Glucarate O-Phosphoric acid	Others	Saccharides and Alcohols	-	B	1260300	1209500	1160200	1400300	1049600	1169000	0.0766594	0.996942	-0.00441831	insig
pmb0885	C18H26O3	4-oxo-9Z,11Z,13E,15E-octadecatetraenoic acid	Lipids	Free fatty acids	-	B	635480	744130	636680	803060	663440	780960	0.803208	1.11465	0.156592	insig
pmb0502	C16H25N3O2	N-p-Coumaroyl spermidine	Alkaloids	Phenolamine	-	A	3060300	2833600	2519100	1863600	2289800	2180000	1.25308	0.752811	-0.40964	insig
pmb0494	C15H22N2O4	N-Sinapoyl putrescine	Alkaloids	Phenolamine	-	A	321730	852430	1162500	5918600	5004600	3963900	1.33992	6.3711	2.67154	up
pma3606	C18H30O3	9-Hydroxy-(10E,12Z,15Z)-octadecatrienoic acid*	Lipids	Free fatty acids	-	B	3847600	5382600	3570900	4421500	4211600	4693200	0.271974	1.04103	0.0580085	insig
pmb2792	C18H30O3	13-HOTrE(r)	Lipids	Free fatty acids	74784-20-6	B	169850	125710	137000	99017	230790	185600	0.343987	1.19153	0.252812	insig
pmb2787	C18H30O3	9-KODE*	Lipids	Free fatty acids	54232-59-6	B	112730	161510	109650	135530	151300	142460	0.608887	1.11826	0.16126	insig
pmb2786	C18H30O3	9-HOTrE	Lipids	Free fatty acids	89886-42-0	B	1109500	1387000	867370	943920	940110	898780	0.803044	0.827264	-0.27358	insig
pmn001687	C13H12O8	Cis-Coutaric acid	Phenolic acids	Phenolic acids	27174-07-8	B	204080	186290	162230	273180	226410	284800	1.28524	1.41945	0.505336	insig
pmb2799	C18H32O3	12,13-EODE	Lipids	Free fatty acids	6799-85-5	A	108550	130520	159580	152660	138990	134010	0.433672	1.06775	0.0945789	insig
pmn001688	C18H32O3	9S-Hyroxy-10E,12E-octadecadienoic acid*	Lipids	Free fatty acids	-	A	2683700	2841100	2376900	2865400	2566500	2874100	0.529316	1.05117	0.0719908	insig
pmb2778	C18H32O3	9,10-EODE*	Lipids	Free fatty acids	65167-83-1	B	3686000	4337300	2859100	3745600	3275900	3533700	0.12303	0.969933	-0.0440428	insig
pme1474	C11H15N5O3S	5'-Deoxy-5'-(methylthio)adenosine	Nucleotides and derivatives	Nucleotides and derivatives	2457-80-9	A	2369200	1993400	1461900	1133800	1299800	1528800	1.08292	0.680299	-0.55576	insig
pmb0197	C11H15N5O5	N2-methylguanosine	Nucleotides and derivatives	Nucleotides and derivatives	-	B	81430	138600	183200	143520	108050	113070	0.180796	0.904298	-0.14513	insig
mws0058	C16H12O6	Diosmetin	Flavonoids	Flavonoid	520-34-3	A	9401.1	50607	23703	25684	32672	32810	0.380584	1.08906	0.123077	insig
Zmhn001926	C13H16O8	Salicylic acid O-glycoside*	Phenolic acids	Phenolic acids	-	A	6307400	10056000	9441000	8295200	6300200	8089500	0.497935	0.87911	-0.185885	insig
Hmtn001302	C13H16O8	glucosyloxybenzoic acid*	Phenolic acids	Phenolic acids	-	B	6244800	10046000	9006900	7571100	6373600	7832300	0.602695	0.860829	-0.216201	insig
pmb0563	C16H13O6	Peonidin	Flavonoids	Anthocyanins	134-01-0	B	36134	300050	71472	80150	55375	110580	0.207418	0.603708	-0.728078	insig
pmb0767	C18H39NO2	D-erythro-Dihydrosphingosine	Lipids	Sphingolipids	764-22-7	A	892390	1439500	1259300	1071400	859720	1009600	0.771408	0.818871	-0.288293	insig
mws0397	C20H30O2	Cis-5,8,11,14,17-Eicosapentaenoic Acid	Lipids	Free fatty acids	10417-94-4	B	4142.7	5162.8	5101.6	4854.3	6071.6	6235.6	0.907603	1.19118	0.252396	insig
mws0369	C20H32O2	Arachidonic Acid	Lipids	Free fatty acids	506-32-1	B	43766	44817	40677	65073	66271	66692	1.44463	1.53207	0.615487	insig
pmb0772	C19H18N2O2	N-Cinnamoyl serotonin	Alkaloids	Phenolamine	-	B	10982	49953	15513	122570	194280	142820	1.29832	6.01285	2.58805	up
pmb0496	C15H22N4O3	N-Feruloyl agmatine	Alkaloids	Phenolamine	-	A	28330000	28665000	22390000	25609000	18140000	20510000	0.941186	0.80946	-0.304968	insig
pmb2855	C11H20N2O8	L-Glutamine O-hexside	Amino acids and derivatives	Amino acids and derivatives	-	B	729110	745870	812270	582130	571620	554740	1.42048	0.746963	-0.420892	insig
pmn001610	C20H36O2	Eicosadienoic acid	Lipids	Free fatty acids	5598-38-9	B	34330	46655	40758	29214	27758	16508	1.17974	0.603567	-0.728415	insig
pmb2857	C11H19NO9	L-Glutamic acid O-glucoside	Amino acids and derivatives	Amino acids and derivatives	-	B	27717	41041	42276	17610	22984	27187	1.17539	0.610453	-0.712049	insig
Lmhn003074	C14H14O8	feruloylmalic acid	Phenolic acids	Phenolic acids	-	A	12523	12885	8139	118410	61634	85255	1.4215	7.90828	2.98336	up
pmb2791	C18H30O4	9-HpOTrE	Lipids	Free fatty acids	111004-08-1	B	176510	176520	130310	174840	169530	240820	0.778418	1.21072	0.275867	insig
pmn001606	C20H38O2	Eicosenoic acid	Lipids	Free fatty acids	26764-41-0	B	182600000	151750000	138440000	66649000	53466000	58258000	1.42495	0.377277	-1.4063	down
pme3967	C12H17N5O5	2-(Dimethylamino)guanosine	Nucleotides and derivatives	Nucleotides and derivatives	2140-67-2	B	1867400	1489400	925050	1260500	1399000	1564900	0.0896396	0.986583	-0.0194878	insig
mws0636	C18H20N2O3	Phe-Phe	Amino acids and derivatives	Amino acids and derivatives	2577-40-4	A	777050	655510	465150	477930	530060	571000	0.659499	0.83205	-0.265258	insig
pmn001689	C18H32O4	9-Hydroxy-12-oxo-10-octadecenoic acid*	Lipids	Free fatty acids	-	B	124570	113040	33948	83071	135460	131120	0.564177	1.28757	0.364655	insig
pmb2804	C18H32O4	13-HPODE	Lipids	Free fatty acids	33964-75-9	B	4276600	5233300	3141900	4517600	4743400	5013300	0.598375	1.12824	0.174077	insig
mws1433	C18H19NO4	N-Feruloyltyramine	Alkaloids	Phenolamine	66648-43-9	A	2337300	4455000	5504900	5510900	6826300	5355200	0.874753	1.43873	0.5248	insig
pmb2871	C13H16O9	2,5-Dihydroxy benzoic acid O-hexside*	Phenolic acids	Phenolic acids	-	B	6565000	8256100	6860300	3750400	3478000	4293200	1.40742	0.531405	-0.912117	insig
pmn001367	C13H16O9	Protocatechuic acid-4-glucoside*	Phenolic acids	Phenolic acids	-	A	5447500	6945100	5724900	3220700	2602400	3408400	1.39489	0.509535	-0.972747	insig
pmn001553	C14H20O8	Cimidahurinine*	Phenolic acids	Phenolic acids	142542-89-0	A	299680	302130	251010	238540	188840	182800	1.2532	0.715485	-0.483006	insig
Hmtn001120	C14H20O8	5-(2-hydroxyethyl)-2-O-glucosylohenol*	Phenolic acids	Phenolic acids	-	B	1152600	1152900	1001200	872050	771680	836990	1.35155	0.75021	-0.414633	insig
pme3459	C20H28O3	Caffeyl alcohol	Phenolic acids	Phenolic acids	469-83-0	B	1218300	2358800	1980000	1952100	1186600	1731200	0.362791	0.876338	-0.19044	insig
Lmzp003276	C18H39NO3	2-amino-octadecane-1，3，4-triol	Alkaloids	Alkaloids	-	A	17246000	12009000	8950800	11347000	12688000	11739000	0.0991674	0.93635	-0.0948802	insig
pmb2221	C18H39NO3	4-Hydroxysphinganine	Lipids	Sphingolipids	554-62-1	B	12818000	12853000	13427000	24485000	22502000	24618000	1.45373	1.83142	0.872966	insig
mws0945	C20H30O3	15-OxoETE*	Lipids	Free fatty acids	81416-72-0	B	8020	9407.3	7670.3	9641.1	9359.5	11319	1.07287	1.20807	0.272701	insig
mws0955	C20H30O3	12-OxoETE*	Lipids	Free fatty acids	108437-64-5	B	8692.6	10840	6871.7	10190	10067	10876	0.799046	1.17909	0.237672	insig
pmp001267	C21H37NO	2-(Dodecylamino)-3-phenyl-1-propanol	Others	Others	-	B	132520	117290	147250	240570	201750	271330	1.38016	1.79734	0.84586	insig
mws0954	C20H32O3	5(S)-HETE*	Lipids	Free fatty acids	70608-72-9	B	4296.6	3579.8	3864.1	9933.6	10155	9148.6	1.45175	2.49029	1.31631	up
mws0879	C20H32O3	12(S)-HETE	Lipids	Free fatty acids	54397-83-0	B	7770.9	9976.1	8163.7	17012	13932	17333	1.37831	1.86321	0.897788	insig
pme3174	C9H14N3O8P	Cytidine 5'-monophosphate(Cytidylic acid)	Nucleotides and derivatives	Nucleotides and derivatives	63-37-6	B	326820	525380	563840	673600	637480	580390	0.946816	1.33575	0.417646	insig
pme3188	C9H13N2O9P	Uridine 5'-monophosphate	Nucleotides and derivatives	Nucleotides and derivatives	58-97-9	A	853280	1559200	1158000	1311200	1333800	1093800	0.231833	1.04714	0.0664573	insig
pmf0359	C15H16O8	Skimmin	Lignans and Coumarins	Coumarins	93-39-0	B	171390	117740	182040	157020	121440	170950	0.129319	0.953817	-0.0682155	insig
mws0983	C20H39NO2	N-Oleoylethanolamine	Others	Others	111-58-0	A	1796700	1856400	1122400	1164500	1589500	2084100	0.0337485	1.01311	0.0187888	insig
pmn001419	C15H18O8	1-O-[(E)-p-Cumaroyl]-β-D-glucopyranose	Phenolic acids	Phenolic acids	-	A	2130600	2174500	1907700	1757100	1456300	1668500	1.27058	0.785781	-0.347801	insig
pmp000107	C18H16O6	Monohydroxy-trimethoxyflavone	Flavonoids	Other Flavonoids	-	B	146380	130590	89902	36065	37681	51595	1.37584	0.341648	-1.54942	down
pmn001690	C16H24O7	3-Hydroxy-4-isopropylbenzylalcohol 3-glucoside	Phenolic acids	Phenolic acids	-	B	43246	41206	43307	30226	27698	22558	1.37005	0.629952	-0.666687	insig
pmn001691	C18H32O5	9,12,13-Trihyroxy-10,15-octadecadienoic acid	Lipids	Free fatty acids	-	A	984990	1057700	508000	545590	613510	494030	0.925785	0.648111	-0.625687	insig
mws0371	C22H32O2	Cis-4,7,10,13,16,19-Docosahexaenoic Acid(C22:6n3)	Lipids	Free fatty acids	6217-54-5	B	2870.6	2234.4	2313.8	2607.7	3337.1	3256	1.04089	1.2402	0.310573	insig
mws0884	C10H12N5O6P	Cyclic AMP	Nucleotides and derivatives	Nucleotides and derivatives	60-92-4	A	1002900	3069300	3229500	2691600	3743600	2131300	0.395937	1.17322	0.230473	insig
pmb3894	C17H14O7	Di-O-methylquercetin	Flavonoids	Flavonols	2068-02-2	A	14593000	16320000	7135800	7821700	8946500	8372700	0.830275	0.660754	-0.597815	insig
HmLn002358	C14H18O9	Vanilloy β-D-glucoside	Phenolic acids	Phenolic acids	-	A	1930800	1634200	1531000	2927400	2460700	2768200	1.38114	1.60053	0.67855	insig
Lmtn002565	C14H18O9	1'-O-vanilloyl-β-D-glucoside	Phenolic acids	Phenolic acids	-	A	702870	750190	613000	70840	47531	50307	1.45372	0.0816424	-3.61454	down
pmn001517	C15H22O8	3,4,5-Trimethoxyphenyl-β-D-Glucopyranoside	Phenolic acids	Phenolic acids	-	B	804850	927540	941710	1651300	1542400	1524000	1.42717	1.76422	0.81903	insig
pmn001694	C18H34O5	9,10,13-Trihyroxy-11-octadecadienoic acid	Lipids	Free fatty acids	-	B	15813000	16903000	8072400	8945200	10186000	9615300	0.786888	0.704771	-0.504773	insig
mws0930	C22H34O2	Docosapentaenoic acid	Lipids	Free fatty acids	24880-45-3	B	1162.3	1182.7	1489.1	2062.4	2219.2	1665.5	1.28339	1.55111	0.633298	insig
pmn001495	C19H38O4	Hexadecanoic acid 2,3-dihydroxypropyl ester	Lipids	Glycerol ester	542-44-9	A	16014000	17551000	7928400	8622900	10105000	9300900	0.815733	0.6755	-0.565972	insig
pme3184	C10H14N5O6P	2'-Deoxyadenosine-5'-monophosphate	Nucleotides and derivatives	Nucleotides and derivatives	653-63-4	B	1705400	1736600	1131900	2095800	2458700	2760600	1.21381	1.59931	0.677453	insig
pmb0789	C14H21NO8	Pyridoxine O-glucoside	Others	Vitamin	-	B	16477000	14589000	8260800	19540000	25726000	27144000	1.17994	1.84124	0.880676	insig
pmp000260	C13H16O10	6-O-Galloyl-β-D-glucopyranoside	Phenolic acids	Phenolic acids	-	B	58097	66077	35658	127090	60602	111900	1.04822	1.87442	0.906443	insig
pmn001518	C13H16O10	1-O-Galloyl-β-D-glucose*	Phenolic acids	Phenolic acids	-	A	62396	86603	46858	84723	54440	103480	0.540328	1.23888	0.309035	insig
HmLn000659	C13H16O10	3-O-galloyl-β-D-glucose*	Tannins	Tannin	-	A	10645000	15091000	6835600	12649000	9715300	14478000	0.419211	1.13112	0.177749	insig
mws0675	C11H15N2O8P	β-Nicotinamide mononucleotide	Nucleotides and derivatives	Nucleotides and derivatives	1094-61-7	B	715160	1062100	1098500	1039800	1073100	765640	0.00385066	1.00097	0.00139398	insig
pmb0776	C20H20N2O3	N-Feruloyl tryptamine	Alkaloids	Phenolamine	53905-13-8	A	258100	323740	220940	275270	306980	344320	0.724606	1.1542	0.206895	insig
mws0932	C20H32O4	15s-Hydroperoxyeicosatetraenoic Acid [15(S)-HpETE]	Lipids	Free fatty acids	70981-96-3	B	54674	45075	40237	41827	42849	43490	0.572088	0.915563	-0.127269	insig
pmb2636	C20H32O4	8,15-DiHETE	Lipids	Free fatty acids	80234-65-7	B	34201	32329	16788	38217	40462	47876	1.01639	1.51894	0.603064	insig
pmb0382	C19H14O6	O-Feruloyl 4-hydroxylcoumarin	Lignans and Coumarins	Coumarins	-	B	1324300	1774400	937710	1650700	1364700	1478500	0.467599	1.11334	0.154895	insig
pmb3068	C16H18O8	1-O-p-Coumaroyl quinic acid	Phenolic acids	Phenolic acids	-	A	47346	39775	34854	127260	102260	137940	1.42943	3.01258	1.591	up
pmb3074	C16H18O8	3-O-p-Coumaroyl quinic acid	Phenolic acids	Phenolic acids	1899-30-5	B	24916	24065	31621	80259	68102	87049	1.43394	2.92065	1.54629	up
pmn001420	C15H18O9	1-O-[(E)-Caffeoyl]-β-D-glucopyranose	Phenolic acids	Phenolic acids	-	B	885900	746920	983150	606930	469270	480240	1.3286	0.594976	-0.749096	insig
mws0264	C12H22O11	D-(+)-TrehaloseAnhydrous*	Others	Saccharides and Alcohols	99-20-7	A	2981700	3053100	2393200	1917800	1551300	1612200	1.35994	0.602907	-0.729993	insig
mws1080	C12H22O11	Galactinol*	Others	Saccharides and Alcohols	3687-64-7	A	10325000	12749000	9488600	7113700	5255500	5658100	1.35418	0.55362	-0.853033	insig
mws5038	C12H22O11	Isomaltulose*	Others	Saccharides and Alcohols	13718-94-0	A	4848500	5269800	4763000	3386100	2282200	2316400	1.35497	0.536559	-0.89819	insig
pme0519	C12H22O11	D-(+)-Sucrose*	Others	Saccharides and Alcohols	57-50-1	A	6323600	7240200	6067500	4083200	3191200	3260300	1.40533	0.536628	-0.898006	insig
pmb2211	C19H38N2O3	Cocamidopropyl betaine	Alkaloids	Alkaloids	4292-10-8	A	1863900	1961200	1176800	1023100	903790	616270	1.22922	0.508439	-0.975854	insig
mws1474	C18H16O7	5,7-Dihydroxy-3',4',5'-trimethoxyflavone	Flavonoids	Flavonoid	18103-42-9	B	364910	550630	227540	397000	252280	133880	0.683238	0.685131	-0.545547	insig
mws0609	C10H12N5O7P	Guanosine 3',5'-cyclic monophosphate	Nucleotides and derivatives	Nucleotides and derivatives	7665-99-8	A	1103100	2908400	2438300	2056500	3072900	1987400	0.300724	1.10341	0.141974	insig
pmb0801	C14H19NO9	4-Pyridoxic acid O-hexoside	Others	Vitamin	-	A	3352200	3121600	2394100	3976700	5181400	5734000	1.26894	1.67933	0.747883	insig
mws0874	C10H14N5O7P	3'-Aenylic acid*	Nucleotides and derivatives	Nucleotides and derivatives	84-21-9	B	25446	48004	42523	37452	50169	25191	0.120512	0.972744	-0.0398684	insig
pmb0981	C10H14N5O7P	Adenosine 5'-monophosphate*	Nucleotides and derivatives	Nucleotides and derivatives	61-19-8	A	7411000	13299000	13806000	11833000	13783000	11896000	0.366496	1.0868	0.120087	insig
pme1692	C10H13N4O8P	Inosine 5'-monophosphate	Nucleotides and derivatives	Nucleotides and derivatives	131-99-7	B	40528	55296	34131	26547	24368	35894	1.08353	0.667993	-0.582096	insig
pmb0149	C21H34O4	MAG(18:4)isomer1	Lipids	Glycerol ester	-	B	227320	209190	232380	263950	207280	278920	0.732085	1.12148	0.16541	insig
pmb0287	C21H34O4	MAG(18:4)isomer2	Lipids	Glycerol ester	-	B	770310	662770	1203900	1207500	1363000	948140	0.878216	1.33434	0.416131	insig
pmb0770	C20H20N2O4	N-Feruloyl serotonin	Alkaloids	Phenolamine	68573-23-9	A	3366200	4374000	2972800	9073400	7074600	7772000	1.37661	2.2328	1.15885	up
pmb2444	C21H36O4	MAG(18:3)isomer1	Lipids	Glycerol ester	-	A	2487500	2039600	1936600	1685600	1836000	2516500	0.35189	0.934155	-0.0982656	insig
pmb2325	C21H36O4	MAG(18:3)isomer2	Lipids	Glycerol ester	-	A	2714500	3883700	3633500	4204800	5022300	5650800	1.16198	1.4541	0.540125	insig
mws0748	C16H18O9	1-Caffeoylquinic acid	Phenolic acids	Phenolic acids	1241-87-8	B	47524	45390	41467	32973	29332	33929	1.37042	0.716128	-0.481711	insig
mws2108	C16H18O9	Cryptochlorogenic acid	Phenolic acids	Phenolic acids	905-99-7	B	65110	51081	62452	216420	205720	199340	1.45443	3.47889	1.79863	up
pmb0164	C21H38O4	MAG(18:2)isomer1	Lipids	Glycerol ester	-	A	229150	119080	91050	86308	180360	241190	0.266378	1.15611	0.209284	insig
Zmhn002422	C16H20O9	Feruloyl glucose	Phenolic acids	Phenolic acids	-	A	172490	232230	135580	470540	486490	541230	1.38801	2.77301	1.47146	up
pmb2363	C21H40O4	MAG(18:1)isomer1	Lipids	Glycerol ester	-	A	9751100	10005000	5805300	4154200	5537900	7205400	0.950946	0.661055	-0.597157	insig
pmb0296	C21H40O4	MAG(18:1)isomer2	Lipids	Glycerol ester	-	A	3537200	3315000	2296600	1719100	1953500	2242000	1.1772	0.646489	-0.629302	insig
pme0085	C18H16O8	Rosmarinic acid	Phenolic acids	Phenolic acids	537-15-5	B	139310	163160	196450	172720	197020	224750	0.849029	1.19155	0.252844	insig
pmb3107	C15H20O10	Syringic acid O-glucoside	Phenolic acids	Phenolic acids	-	B	2642100	2633300	2622400	4687900	4490900	4369800	1.4559	1.71549	0.778621	insig
pmb0998	C10H14N5O8P	Guanosine 5'-monophosphate	Nucleotides and derivatives	Nucleotides and derivatives	85-32-5	B	341520	697350	586840	668850	605150	589430	0.512648	1.14623	0.196891	insig
pmb0752	C17H20O9	3-O-Feruloyl quinic acid	Phenolic acids	Phenolic acids	1899-29-2	A	4684100	5225400	4635900	18514000	16605000	17376000	1.45415	3.60904	1.85162	up
pmn001695	C16H20O10	Trihydroxycinnamoylquinic acid	Phenolic acids	Phenolic acids	-	A	534180	473620	501790	360490	358840	366790	1.41811	0.71948	-0.474973	insig
mws0232	C17H20N4O6	Riboflavin	Others	Vitamin	83-88-5	A	662370	777690	724650	374160	687580	659020	0.802215	0.794915	-0.331128	insig
pme3337	C14H17N5O8	N6-Succinyl Adenosine	Nucleotides and derivatives	Nucleotides and derivatives	4542-23-8	A	11560000	12140000	10129000	10271000	8651100	11934000	0.600934	0.91212	-0.132705	insig
pmn001318	C21H20O7	1,3-O-Di-p-Coumaroyl glycerol	Phenolic acids	Phenolic acids	-	A	5535	9149	10780	17825	19868	18858	1.30184	2.22082	1.15109	up
pme1286	C14H20N6O5S	S-(5'-Adenosy)-L-homocysteine	Amino acids and derivatives	Amino acids and derivatives	979-92-0	A	660400	864130	530570	370580	336810	357030	1.34444	0.517941	-0.949141	insig
pmb2940	C17H22O10	1-O-β-D-Glucopyranosyl sinapate	Phenolic acids	Phenolic acids	78185-48-5	B	3563800	5013500	4222100	15778000	15510000	13656000	1.43172	3.51141	1.81205	up
pmp000113	C20H20O8	5-Hydroxy-6,7,8,3',4'-pentamethoxyflavone	Flavonoids	Flavonoid	2174-59-6	B	745580	571350	531280	278450	207380	341860	1.32691	0.447833	-1.15897	down
pmb0489	C19H28N2O7	N-Hexosyl-p-coumaroyl putrescine	Alkaloids	Phenolamine	-	A	9009500	9152300	7162900	2910900	2828400	3335400	1.4367	0.358334	-1.48062	down
pme2735	C15H22N6O5S	S-(5'-Adenosyl)-L-methionine	Amino acids and derivatives	Amino acids and derivatives	29908-03-0	B	1729300	1371000	1241700	844680	968700	1278600	1.06289	0.71211	-0.489829	insig
pmc0281	C15H21N5O8	Adenosine O-ribose	Nucleotides and derivatives	Nucleotides and derivatives	-	B	4432900	4617200	4272400	7561100	6411200	7678300	1.41498	1.62512	0.700542	insig
pme3007	C9H14N2O12P2	Uridine 5’-diphosphate	Nucleotides and derivatives	Nucleotides and derivatives	27821-45-0	B	58944	47360	44129	58977	43374	52670	0.19534	1.0305	0.0433426	insig
pmb3031	C20H20O9	Tricin O-glycerol	Flavonoids	Flavonoid	-	A	29149	19643	60892	87604	128820	115240	1.27404	3.02381	1.59637	up
pmp000114	C21H24O8	5,6,7,8,3',4'-Hexamethoxyflavanone	Flavonoids	Dihydroflavone	-	B	1283700	794900	579480	343890	271390	442370	1.23332	0.3979	-1.32952	down
pmb0500	C23H26N2O5	"N',N""-p-Coumaroyl-feruloyl putrescine"	Alkaloids	Phenolamine	-	A	59702	67699	69436	106570	92746	109640	1.39229	1.5696	0.6504	insig
pmn001319	C22H22O8	1-O-Feruloyl-3-O-p-Coumaroyl glycerol	Phenolic acids	Phenolic acids	-	A	161300	188210	299610	462180	543040	468250	1.32844	2.26995	1.18266	up
pmn001663	C22H26O8	Syringaresinol	Lignans and Coumarins	Lignans	21453-69-0	A	15752	17704	22409	13167	17054	14425	0.954915	0.799177	-0.323414	insig
mws2523	C12H23O14P	Trehalose 6-phosphate	Others	Saccharides and Alcohols	4484-88-2	B	65036	84823	94023	143040	123410	120640	1.28426	1.5872	0.666486	insig
pmb0864	C19H40NO7P	LysoPE 14:0	Lipids	LPE	-	A	687550	833470	1134700	1004100	758360	812960	0.0813367	0.969763	-0.0442953	insig
pmd0158	C19H40NO7P	LysoPE 14:0 (2n isomer)	Lipids	LPE	-	B	392080	369400	244860	503320	711860	690260	1.26943	1.89344	0.921006	insig
Lmhn204620	C22H18O9	p-coumaroylp-coumaroylmalic acid	Phenolic acids	Phenolic acids	-	B	5924.5	7646.4	4562.8	3652.4	5966.6	3445.6	0.888283	0.72046	-0.47301	insig
Lmlp003201	C21H20O10	5,7,4'-Trihydroxy-8-C-β-D-glucopyranosylflavone*	Flavonoids	Flavonoid carbonoside	-	A	2438800	5166100	2655800	477080	562610	797370	1.39482	0.179038	-2.48166	down
pmp000116	C21H20O10	Apigenin-8-C-glucoside*	Flavonoids	Flavonoid carbonoside	3681-93-4	A	3036900	4765600	2890300	947750	1098200	1171700	1.41263	0.300917	-1.73256	down
mws1434	C21H20O10	Isovitexin*	Flavonoids	Flavonoid carbonoside	29702-25-8	A	573550	1165900	598880	116930	145980	211970	1.38046	0.203085	-2.29984	down
Lmdp003577	C21H20O10	Genistin (Genistein 7-O-Glucoside)	Flavonoids	Isoflavones	-	B	50497	314810	129620	36660	31999	14847	1.19599	0.168724	-2.56726	down
pmp000413	C21H20O10	Genistein 8-C-glucoside*	Flavonoids	Flavonoid carbonoside	66026-80-0	B	1981200	4728500	2393500	402030	516460	738140	1.37525	0.181983	-2.45812	down
pmp000117	C22H24O9	3,5,6,7,8,3',4'-Heptamethoxyflavone	Flavonoids	Flavonols	1178-24-1	A	10767000	6998400	6746200	3632400	2268300	4162600	1.27734	0.410553	-1.28436	down
pmb0744	C24H18O8	Tricin O-phenylformic acid	Flavonoids	Flavonoid	-	A	211870	414710	694410	938000	1399100	1655500	1.22221	3.02243	1.59571	up
Zmhn003534	C21H22O10	Naringenin-O-glucoside	Flavonoids	Flavonoid	-	A	567250	40071	81566	860000	422250	883330	1.08164	3.14359	1.65241	up
pmb0862	C20H42NO7P	LysoPC 12:0	Lipids	LPC	-	B	126340	129420	92274	152500	172620	167890	1.22387	1.41656	0.502389	insig
pmp000091	C23H24O9	Glyceryl 1,3-diferulate	Phenolic acids	Phenolic acids	83008-46-2	A	1801200	2065600	2338800	2188700	2310200	2211300	0.678972	1.08131	0.112785	insig
mws2209	C21H20O11	Astragalin*	Flavonoids	Flavonols	480-10-4	B	60363	5384	8773.5	76680	46775	72351	1.06066	2.62755	1.39372	up
mws0045	C21H20O11	Quercitrin	Flavonoids	Flavonols	522-12-3	B	445780	379090	203290	214390	94188	106540	1.16511	0.403748	-1.30847	down
pme2459	C21H20O11	Luteolin 7-O-glucoside(Cynaroside)	Flavonoids	Flavonoid	5373-11-5	A	193110	1501400	862140	404390	282600	87104	0.872528	0.302777	-1.72367	insig
mws0089	C21H20O11	Kaempferol 7-O-glucosdie*	Flavonoids	Flavonols	16290-07-6	B	53989	40029	17264	83887	66649	60552	1.05194	1.89687	0.923624	insig
mws1299	C21H20O11	Orientin*	Flavonoids	Flavonoid carbonoside	28608-75-5	B	454300	3622800	1765600	142540	245380	396840	1.18325	0.134315	-2.89631	down
mws1048	C21H20O11	Cyanidin 3-O-galactoside	Flavonoids	Anthocyanins	27661-36-5	A	336560	4543700	2767400	9	9	9	1.45365	3.53049e-06	-18.1117	down
mws1608	C21H20O11	HoMoorientin*	Flavonoids	Flavonoid carbonoside	4261-42-1	A	88924	824840	362980	23069	46081	71147	1.19137	0.109887	-3.18591	down
pmb0550	C21H21O11	Cyanidin 3-O-glucoside(Kuromanin)	Flavonoids	Anthocyanins	7084-24-4	B	413990	5451700	3309200	9	9	9	1.45416	2.94281e-06	-18.3744	down
pmd0160	C21H44NO7P	LysoPE 16:0(2n isomer)	Lipids	LPE	-	A	12090000	14596000	18161000	13381000	10525000	10670000	0.985818	0.770977	-0.375241	insig
pmb0876	C21H44NO7P	LysoPE 16:0	Lipids	LPE	53862-35-4	A	487870	629410	615630	489690	470250	492980	1.07088	0.838428	-0.254241	insig
pmb0478	C21H26O11	Coumarin O-rutinoside	Phenolic acids	Phenolic acids	-	B	82628	76498	67371	59647	72169	57412	1.02503	0.835455	-0.259366	insig
pmb0464	C16H27NO14	Aspartic acid di-O-glucoside	Amino acids and derivatives	Amino acids and derivatives	-	B	3971100	5031200	4256900	3119700	2146600	2652400	1.31961	0.597223	-0.743658	insig
pmp000579	C22H22O11	Diosmetin-7-O-galactoside	Flavonoids	Flavonoid	-	A	640920	3389200	1139400	219740	183920	156340	1.32773	0.108327	-3.20653	down
Zmhn003191	C22H22O11	Isoscoparin*	Flavonoids	Flavonoid	20013-23-4	A	1143900	2961900	1456300	74067	99249	108860	1.43718	0.0507319	-4.30096	down
pmp001163	C22H22O11	Tectoridin*	Flavonoids	Isoflavones	611-40-5	B	29310	188070	67277	9	9	9	1.45603	9.4851e-05	-13.364	down
pmp000120	C22H22O11	Diosmetin-6-C-glucoside	Flavonoids	Flavonoid	-	A	1456500	3792400	1779700	53265	82173	99020	1.43743	0.0333577	-4.90584	down
Lmdp003286	C21H20O12	isohyperoside*	Flavonoids	Flavonols	35589-21-0	B	154560	1299500	724600	132330	225330	169760	0.981796	0.242085	-2.04642	insig
pmp000580	C21H20O12	Isoquercitrin(Quercetin 3-O-β-D-glucoside)*	Flavonoids	Flavonols	482-35-9	A	66450	709340	413360	44115	90284	93854	0.986332	0.191946	-2.38122	insig
mws1329	C21H20O12	Gossypitrin	Flavonoids	Flavonols	491-50-9	B	16447	184350	77031	17653	9	26326	0.820084	0.158328	-2.65901	insig
pmp001309	C21H20O12	6-Hydroxykaempferol-7-O-glucoside*	Flavonoids	Flavonols	-	B	195160	2177900	979990	157700	301540	256900	0.944006	0.213579	-2.22716	insig
Lmzp002365	C22H24O11	hesperetin-7-O-glucoside	Flavonoids	Flavonoid	31712-49-9	A	6858700	5543300	3103700	2962400	1354900	1959900	1.18019	0.404832	-1.30461	down
pme1598	C22H24O11	Hesperetin 5-O-glucoside	Flavonoids	Dihydroflavonol	69651-80-5	B	28339	323820	105470	24260	42051	19200	0.998476	0.186857	-2.42	insig
pmb2957	C24H18O10	Cyanidin O-syringic acid	Flavonoids	Anthocyanins	-	A	9	412110	220350	9	9	9	1.05848	4.26898e-05	-14.5157	down
pmd0130	C22H46NO7P	LysoPC 14:0(2n isomer)	Lipids	LPC	-	A	11592000	10460000	7118600	8440100	11428000	11246000	0.310183	1.06663	0.0930535	insig
pmb0866	C22H46NO7P	LysoPC 14:0	Lipids	LPC	-	B	3996300	4730100	5243100	7383800	5943900	6626800	1.26547	1.42843	0.514434	insig
pmb1912	C20H23N7O7	10-Formyl-THF	Alkaloids	Alkaloids	2800-34-2	A	6466800	7197200	6805900	12092000	12847000	14068000	1.43869	1.90558	0.930229	insig
pmb3116	C23H42NO7P	LysoPE 18:3	Lipids	LPE	-	B	16051	7017.6	6558.9	5150.2	9497	8520.5	0.361394	0.781966	-0.354822	insig
pmb0874	C23H44NO7P	LysoPE 18:2(2n isomer)	Lipids	LPE	-	A	25307000	21169000	14896000	16878000	19005000	19822000	0.320294	0.907661	-0.139774	insig
pmn001525	C23H26O11	3,5-Di-O-galloylshikimic acid	Phenolic acids	Phenolic acids	95753-52-9	B	39065	28583	39374	16518	13864	15197	1.39753	0.425884	-1.23147	down
pmb0856	C23H46NO7P	LysoPE 18:1(2n isomer)	Lipids	LPE	-	A	12982000	10683000	6569600	13200000	14664000	15716000	1.01902	1.44139	0.527466	insig
mws0289	C23H46NO7P	LysoPE 18:1	Lipids	LPE	89576-29-4	A	5688200	4408400	2981200	3980100	4260400	4861800	0.135456	1.00187	0.00270022	insig
pmb0883	C23H48NO7P	LysoPE 18:0	Lipids	LPE	69747-55-3	B	146430	188700	290620	214710	124820	139600	0.652037	0.765689	-0.385169	insig
pmb0880	C23H48NO7P	LysoPE 18:0(2n isomer)	Lipids	LPE	-	B	466260	542170	505000	743640	972390	822760	1.37097	1.67751	0.746319	insig
pmb3072	C22H26O12	3-O-p-coumaroyl shikimic acid O-hexoside	Phenolic acids	Phenolic acids	-	B	110920	152970	95363	60086	50438	67079	1.33254	0.494367	-1.01634	down
pmb3066	C22H26O12	5-O-p-Coumaroyl shikimic acid O-hexoside	Phenolic acids	Phenolic acids	-	B	61722	63107	40136	48973	44176	43971	0.710472	0.831207	-0.266721	insig
Hmyn007081	C22H43O9P	LysoPG(16:1)	Lipids	Glycerol ester	-	B	23072	16997	9425.6	13452	23429	24340	0.522479	1.23692	0.306755	insig
Hmyn007168	C22H45O9P	LysoPG(16:0)	Lipids	Glycerol ester	-	A	1900400	2073600	1588300	2071900	1904200	1929700	0.51575	1.06176	0.0864509	insig
pmb0863	C24H46NO7P	LysoPC 16:2(2n isomer)	Lipids	LPC	-	A	10252000	10002000	7339300	11294000	13429000	14780000	1.18056	1.43162	0.517644	insig
Lmzn003538	C23H24O12	Tricin-7-O-glucopyranoside*	Flavonoids	Flavonoid	32769-01-0	A	14626	125410	39775	22586	18139	40340	0.543762	0.450834	-1.14933	insig
pmp001164	C23H24O12	Iristectorin B*	Flavonoids	Isoflavones	94396-09-5	B	26918	139410	39960	24547	19453	46938	0.746134	0.44083	-1.1817	insig
pmb0848	C24H48NO7P	LysoPC 16:1 (2n isomer)	Lipids	LPC	-	B	359050	290780	280360	274230	219810	368860	0.355633	0.92766	-0.108332	insig
pmb0165	C24H48NO7P	LysoPC 16:1	Lipids	LPC	-	B	3003200	2389100	2042100	2796300	3014500	3129100	0.95679	1.2025	0.266042	insig
pmd0132	C24H50NO7P	LysoPC 16:0(2n isomer)	Lipids	LPC	-	A	869400	759670	660930	546980	619580	651380	1.11022	0.79386	-0.333043	insig
pmb0855	C24H50NO7P	LysoPC 16:0	Lipids	LPC	17364-16-8	A	888230	897490	916430	1067300	850960	1045500	0.757844	1.09682	0.133321	insig
pmb0745	C26H24O10	Tricin 4'-O-syringyl alcohol	Flavonoids	Flavonoid	-	A	1382500	1264200	6323700	1742900	3837000	4838100	0.426314	1.16138	0.215834	insig
pmb3061	C22H28O13	5-O-p-Coumaroyl quinic acid O-hexoside	Phenolic acids	Phenolic acids	-	B	34883	52463	36896	26892	18697	36207	1.01537	0.65836	-0.603051	insig
pme0500	C18H32O16	D-(+)-Melezitose	Others	Saccharides and Alcohols	597-12-6	B	10960	11455	10444	18066	17307	24728	1.36435	1.82906	0.8711	insig
Hmjp007381	C27H46O9	Glyceryl linoleate-O-Hexoside	Lipids	Glycerol ester	-	A	1663100	1530900	1026100	1136300	1143100	1504500	0.379864	0.896638	-0.157403	insig
Hmqp006235	C21H46N3O9P	LysoPC 18:4	Lipids	LPC	-	A	2099400	2147100	1853100	2995000	3376200	3331000	1.41357	1.59063	0.669597	insig
pmb0854	C26H48NO7P	LysoPC 18:3	Lipids	LPC	-	A	689790	593820	418730	560700	1282400	649800	0.717534	1.4644	0.550306	insig
pmb0865	C26H48NO7P	LysoPC 18:3(2n isomer)	Lipids	LPC	-	A	17076000	14435000	13069000	17416000	18112000	15272000	0.858787	1.13952	0.188432	insig
pmb0873	C26H50NO7P	LysoPC 18:2 (2n isomer)	Lipids	LPC	-	B	4518900	4177400	3746100	3708600	4207400	3477300	0.720846	0.915683	-0.127079	insig
pmb0852	C26H50NO7P	LysoPC 18:2	Lipids	LPC	-	B	6540000	5937100	4872600	4799300	5260000	5650700	0.617499	0.905491	-0.143228	insig
pmb0859	C26H52NO7P	LysoPC 18:1 (2n isomer)	Lipids	LPC	-	B	16156000	14632000	10822000	14595000	15542000	15615000	0.595948	1.09954	0.136905	insig
pmp001281	C26H52NO7P	LysoPC(18:1)	Lipids	LPC	-	A	2062200	1040200	631510	1641300	1832600	1406100	0.707989	1.30694	0.386194	insig
pmn001710	C24H26O13	Rosmarinyl Glucoside	Phenolic acids	Phenolic acids	-	B	81894	96064	80204	60714	50904	77025	1.13292	0.730716	-0.452618	insig
pmp001286	C26H54NO7P	LysoPC(18:0)	Lipids	LPC	-	A	11245000	11949000	10391000	11988000	10965000	11423000	0.336918	1.02355	0.0335847	insig
pmb2388	C26H54NO7P	LysoPC 18:0 (2n isomer)	Lipids	LPC	-	B	2059400	1795200	1360100	1687100	1955500	2250800	0.601044	1.13015	0.176516	insig
pmb3053	C27H24O11	Tricin O-eudesmic acid	Flavonoids	Flavonoid	-	A	86568	60315	201990	176270	353070	411220	1.13635	2.696	1.43082	up
pmp000234	C27H26O11	Salcolin A*	Flavonoids	Flavonoid	-	B	5578000	6634800	19232000	11384000	20095000	34776000	0.919617	2.10703	1.07521	insig
pmb0717	C27H26O11	Tricin 5-O-β-guaiacylglycerol	Flavonoids	Flavonoid	-	B	61279	207160	139060	29431	92314	88494	0.809655	0.515925	-0.954766	insig
pmb0746	C27H26O11	Tricin 4'-O-β-guaiacylglycerol	Flavonoids	Flavonoid	-	A	5378900	6385400	18714000	11263000	20342000	33651000	0.936813	2.14106	1.09833	insig
pmp000235	C27H26O11	Salcolin B*	Flavonoids	Flavonoid	-	B	5262200	6172500	18808000	10638000	19794000	33661000	0.909669	2.11929	1.08358	insig
pmb2833	C23H30O14	3-O-Feruloyl quinic acid glucoside	Phenolic acids	Phenolic acids	-	A	1051900	1224800	1063400	851840	716810	763210	1.37188	0.698141	-0.51841	insig
pmp001110	C25H26O13	Apigenin-6-C-β-D-xyloside-8-C-β-Darabinoside	Flavonoids	Flavonoid carbonoside	-	A	601720	2019600	1002700	224100	206710	213100	1.35644	0.177678	-2.49266	down
pmc0960	C28H50NO7P	LysoPC 20:4	Lipids	LPC	-	B	653160	689660	467440	619850	616430	611510	0.192548	1.02073	0.0296039	insig
pmn001671	C23H32O15	β-D-Furanofructosyl-α-D-(6-mustard acyl)glucoside*	Phenolic acids	Phenolic acids	-	B	68599	122390	86937	134360	117190	104110	0.827045	1.27969	0.355798	insig
pmn001672	C23H32O15	β-D-Furanofructosyl-α-D-(3-mustard acyl)glucoside*	Phenolic acids	Phenolic acids	-	A	45662	70577	58550	326740	293120	340160	1.43777	5.49245	2.45745	up
pmd0144	C28H56NO7P	LysoPC 20:1 (2n isomer)	Lipids	LPC	-	B	41219000	31520000	16078000	24380000	35131000	36574000	0.320681	1.08183	0.113475	insig
pmd0145	C28H56NO7P	LysoPC 20:1	Lipids	LPC	-	B	37515000	29066000	14747000	22396000	31746000	33512000	0.313774	1.07778	0.108068	insig
pmb2979	C25H26O14	Hesperetin O-malonylhexoside	Flavonoids	Dihydroflavonol	-	B	53466	48023	40274	55624	37828	58908	0.282962	1.07475	0.104003	insig
mws1292	C26H28O14	Isoschaftoside	Flavonoids	Flavonoid carbonoside	52012-29-0	A	1537100	5055700	1878400	1523200	3233400	1998100	0.261717	0.797372	-0.326675	insig
pmb2922	C15H24N2O17P2	Uridine 5'-diphospho-D-glucose	Nucleotides and derivatives	Nucleotides and derivatives	133-89-1	A	3800900	3826000	3980100	4747100	4402700	4519900	1.39032	1.17771	0.235986	insig
pmb0631	C26H28O15	C-Hexosyl-luteolin C-pentoside	Flavonoids	Flavonoid carbonoside	-	B	46213	505410	179460	128690	225140	266210	0.163353	0.848112	-0.237674	insig
mws1066	C27H32O14	Narirutin*	Flavonoids	Dihydroflavone	14259-46-2	A	4716400	3314800	1927200	1590800	767140	1039000	1.22866	0.341113	-1.55168	down
mws0046	C27H32O14	Naringin*	Flavonoids	Dihydroflavone	10236-47-2	A	132110	93824	71526	59075	42715	71392	1.08389	0.582203	-0.780407	insig
pmb2936	C28H32O14	Disinapoyl hexoside	Phenolic acids	Phenolic acids	-	B	1305.1	4780.4	6111	9004	6985.1	6204.3	0.879309	1.81965	0.863664	insig
Zmhp002798	C27H30O15	Isosaponarin	Flavonoids	Flavonoid	19416-87-6	A	1859900	3658600	2672700	1408600	2514600	1926200	0.81236	0.714108	-0.485786	insig
mws1073	C27H30O15	Apigenin 6,8-C-diglucoside*	Flavonoids	Flavonoid	23666-13-9	A	852510	648260	356240	227650	182400	209090	1.29776	0.333407	-1.58464	down
pmn001713	C27H30O15	Luteolin-7-O-β-D-rutinoside*	Flavonoids	Flavonoid	-	B	75009	36679	16414	14654	11319	16219	1.04133	0.329363	-1.60225	down
mws0169	C27H31ClO15	Cyanidin 3-rutinoside(Keracyanin chloride)	Flavonoids	Anthocyanins	18719-76-1	A	216840	2126400	2085300	9	9	9	1.45327	6.09682e-06	-17.3235	down
pmb3002	C28H32O15	Chrysoeriol 7-O-rutinoside*	Flavonoids	Flavonoid	-	A	137180	262140	184120	60846	59091	67586	1.39333	0.321409	-1.63752	down
pmp001080	C28H32O15	Neodiosmin*	Flavonoids	Flavonoid	38665-01-9	B	727100	1672800	1042300	450040	331020	406520	1.32101	0.345006	-1.53531	down
pmp000594	C28H32O15	Diosmetin-7-O-rutin*	Flavonoids	Flavonoid	-	A	720620	1686400	1023200	463610	298050	331950	1.32066	0.318816	-1.6492	down
Hmmp002336	C30H26O14	Quercetin-O-feruloyl-Pentoside	Flavonoids	Flavonols	-	A	204780	1048000	1044500	726520	684950	518670	0.0240636	0.840185	-0.251221	insig
Lmmp003091	C27H30O16	Quercetin glu-rha	Flavonoids	Flavonols	-	B	22034000	18112000	9854500	10720000	4944100	6006500	1.13992	0.433408	-1.2062	down
Zmhp002574	C27H30O16	Iso-8-C-hexosyl-luteolin O-hexoside*	Flavonoids	Flavonoid carbonoside	-	A	32092	208080	204990	61167	92122	139510	0.22932	0.657736	-0.60442	insig
pmb0624	C27H30O16	6-C-Hexosyl-luteolin O-hexoside	Flavonoids	Flavonoid carbonoside	-	B	9	74404	46503	9	9	9	1.05851	0.000223296	-12.1288	down
pmn001583	C27H30O16	Bioquercetin*	Flavonoids	Flavonols	52525-35-6	A	32916	146270	116260	91135	89665	56780	0.13574	0.80414	-0.314481	insig
pme0001	C28H34O15	Hesperetin 7-O-neohesperidoside(Neohesperidin)	Flavonoids	Dihydroflavone	13241-33-3	A	8047700	6940500	4169300	3712700	1792600	2459700	1.22083	0.415764	-1.26616	down
mws0036	C28H34O15	Hesperidin	Flavonoids	Dihydroflavone	520-26-3	B	7577900	6375400	3706800	3501400	1806000	2254100	1.20272	0.428169	-1.22375	down
Zmxp002867	C28H32O16	Chrysoeriol-di-O-glucoside*	Flavonoids	Flavonoid	-	B	77847	130640	102680	67963	93220	94179	0.689546	0.820659	-0.285145	insig
Zmhp002897	C28H32O16	Isochrysoeriol C-hexosyl-O-hexoside	Flavonoids	Flavonoid	-	A	1169000	3088800	2316700	1142900	2240300	2395200	0.228236	0.878911	-0.186211	insig
pmp000127	C28H32O16	Chysoeriol-6,8-di-C-glucoside*	Flavonoids	Flavonoid carbonoside	-	A	358440	297000	158660	9	9	9	1.45915	3.31655e-05	-14.88	down
pmb3043	C29H34O16	Tricin 5-O-rutinoside	Flavonoids	Flavonoid	-	B	29398	140930	78624	91875	85703	92871	0.371161	1.08635	0.119489	insig
pmb0716	C29H34O17	Tricin di-O-hexoside	Flavonoids	Flavonoid	-	B	9	9	9	47968	93908	109700	1.45921	9317.63	13.1857	up
Hmyn005706	C31H58O14	DMGM(16:0)	Lipids	Glycerol ester	-	A	1257100	1327300	989680	592930	676100	967030	1.18749	0.625632	-0.676613	insig
pmb0530	C21H27N7O14P2	Nicotinic acid adenine dinucleotide	Nucleotides and derivatives	Nucleotides and derivatives	53-84-9	A	2528400	2653000	2679500	3210200	2609700	2381000	0.259506	1.04325	0.0610877	insig
mws4163	C24H42O21	1,1-Kestotetraose	Others	Saccharides and Alcohols	13133-07-8	B	6114.8	7382.9	13240	24426	31562	22924	1.33062	2.95134	1.56137	up
Hmjp006575	C33H56O14	Glyceryl linoleate-O-Hexoside-O-Hexoside	Lipids	Glycerol ester	-	A	304970	255580	224880	92301	97322	179550	1.25156	0.470027	-1.08919	down
pmp001276	C33H56O14	2,3-Dihydroxypropyl-9,12,15-octadecatrienoate-hexose-hexose	Lipids	Free fatty acids	-	B	12631000	12655000	11056000	5989300	6609900	8625800	1.33764	0.584035	-0.775873	insig
pmp001271	C33H58O14	2,3-Dihydroxypropyl-9,12-octadecadienoate-hexose-hexose	Lipids	Free fatty acids	-	A	246800	278300	171210	96687	85726	154630	1.23659	0.484042	-1.0468	down
Hmgp003328	C33H36O16	Tricin-O-guaiacylglycerol-O-Hexoside	Flavonoids	Flavonoid	-	A	236750	1001900	593110	813250	686180	1037100	0.658966	1.38475	0.469626	insig
pmb0723	C33H36O16	Tricin 4'-O-(β-guaiacylglyceryl)ether O-hexoside	Flavonoids	Flavonoid	-	A	7340.4	19283	4083.8	487750	1585700	1904000	1.41177	129.528	7.01712	up
pmn001369	C32H42O17	1-Hydroxypineolin Diglucoside	Lignans and Coumarins	Lignans	-	B	256090	219440	235560	9	9	9	1.46051	3.79699e-05	-14.6848	down
pmb0168	C38H70NO8P	PC 16:1/14:1	Lipids	PC	-	B	1003800	1100300	1498200	1742500	1229000	1092500	0.425456	1.12817	0.173982	insig
pmp000129	C33H40O18	Natsudaidain 3-O-(3-hydroxy-3-methylglutarate)-glucoside)	Flavonoids	Flavonols	-	A	261320	228290	207110	105110	60598	138700	1.25752	0.436916	-1.19457	down
pmb0680	C36H36O17	C-Hexosyl-apigenin O-p-coumaroylhexoside	Flavonoids	Flavonoid carbonoside	-	B	41848	424190	104830	154840	319750	319300	0.615202	1.39067	0.475782	insig
Latp002399	C33H40O19	Kaempferol rha-glc-rha	Flavonoids	Flavonols	-	B	170360	1428300	357660	407820	1042300	1129500	0.51358	1.31861	0.399016	insig
pme2651	C21H28N7O17P3	NADP	Nucleotides and derivatives	Nucleotides and derivatives	53-59-8	B	168170	182670	213180	200940	167590	196680	0.0294071	1.00211	0.00304067	insig
pmb0660	C36H36O18	C-Hexosyl-luteolin O-p-coumaroylhexoside	Flavonoids	Flavonoid carbonoside	-	B	11605	152170	30341	42388	59857	121600	0.459457	1.15315	0.205581	insig
Zmhp003186	C37H38O18	isovitexin 2''-O-(6'''-(E)-feruloyl)glucoside	Flavonoids	Flavonoid	-	A	44200	264160	42248	211100	524320	793120	1.10371	4.35968	2.12422	up
pmb0592	C34H42O20	Chrysoeriol O-hexosyl-O-rutinoside	Flavonoids	Flavonoid	-	B	37393	209590	57170	181240	416390	555450	1.11101	3.79112	1.92262	up
Hmgp003645	C36H38O19	Tricin-O-Malonyl-O-guaiacylglycerol-O-Hexoside 2	Flavonoids	Flavonoid	-	A	59151	164500	103820	25110	23032	29445	1.3498	0.236928	-2.07748	down
pme2746	C27H33N9O15P2	Flavin adenine dinucleotide(FAD)	Nucleotides and derivatives	Nucleotides and derivatives	146-14-5	A	144870	137690	111080	109620	135270	149130	0.00502139	1.00097	0.00139203	insig
pmb0666	C38H40O19	6-C-Hexosyl-apigenin O-sinapoylhexoside	Flavonoids	Flavonoid carbonoside	-	B	34328	134650	24395	26376	61846	228610	0.33327	1.63845	0.712332	insig
pmp000130	C39H50O23	Natsudaidain 3-O-(5-glucosyl-3-hydroxy-3-methylglutarate)-glucoside)	Flavonoids	Flavonols	-	A	56225	54380	45928	38771	21868	44438	1.00878	0.671277	-0.57502	insig

## Sheet: Table S7
KR
Index	Formula	Compounds	Class I	Class II	CAS	Level	CK-1	CK-2	CK-3	Al-1	Al-2	Al-3	VIP	Fold_Change	Log2FC	Type
pmp000107	C18H16O6	Monohydroxy-trimethoxyflavone	Flavonoids	Other Flavonoids	-	B	1825900	703740	549450	146380	130590	89902	1.33815	0.119149	3.06916	up
pme2853	C8H15NO3	Hexanoyl glycine	Amino acids and derivatives	Amino acids and derivatives	24003-67-6	B	278120	213490	317910	40771	51524	21434	1.40306	0.140489	2.83147	up
pmp000127	C28H32O16	Chysoeriol-6,8-di-C-glucoside*	Flavonoids	Flavonoid carbonoside	-	A	2551400	988090	563240	358440	297000	158660	1.18176	0.198429	2.33331	up
mws1608	C21H20O11	HoMoorientin*	Flavonoids	Flavonoid carbonoside	4261-42-1	A	2044300	3310000	1065500	88924	824840	362980	1.13825	0.198876	2.33006	up
mws0169	C27H31ClO15	Cyanidin 3-rutinoside(Keracyanin chloride)	Flavonoids	Anthocyanins	18719-76-1	A	5605900	11149000	5316300	216840	2126400	2085300	1.11912	0.200648	2.31726	up
mws1066	C27H32O14	Narirutin*	Flavonoids	Dihydroflavone	14259-46-2	A	28730000	10965000	7262700	4716400	3314800	1927200	1.19031	0.212072	2.23738	up
Zmhp002574	C27H30O16	Iso-8-C-hexosyl-luteolin O-hexoside*	Flavonoids	Flavonoid carbonoside	-	A	620270	1048400	369050	32092	208080	204990	1.12038	0.218461	2.19455	up
pmn001713	C27H30O15	Luteolin-7-O-β-D-rutinoside*	Flavonoids	Flavonoid	-	B	341490	108190	90965	75009	36679	16414	1.10099	0.236943	2.07739	up
pmp000113	C20H20O8	5-Hydroxy-6,7,8,3',4'-pentamethoxyflavone	Flavonoids	Flavonoid	2174-59-6	B	5225200	1265500	1136100	745580	571350	531280	1.08003	0.242331	2.04495	up
pmb0550	C21H21O11	Cyanidin 3-O-glucoside(Kuromanin)	Flavonoids	Anthocyanins	7084-24-4	B	10510000	17250000	7615400	413990	5451700	3309200	1.0503	0.259358	1.94698	up
pmb0880	C23H48NO7P	LysoPE 18:0(2n isomer)	Lipids	LPE	-	B	217400	248980	139920	466260	542170	505000	1.36521	2.49617	-1.31972	down
mws1208	C10H22O2	1,10-Decanediol	Others	Saccharides and Alcohols	112-47-0	B	159750	134560	119060	535110	382680	160940	1.0859	2.6096	-1.38383	down
mws0145	C8H8O3	2-Methoxybenzoic acid*	Phenolic acids	Phenolic acids	529-75-9	B	100620	69945	70528	338950	174320	174020	1.30044	2.85073	-1.51133	down
pme1184	C10H13N5O4	Deoxyguanosine*	Nucleotides and derivatives	Nucleotides and derivatives	961-07-9	B	825100	512020	527530	2030000	2430400	1046100	1.24585	2.9531	-1.56223	down
pme0264	C10H14N2O5	Thymidine	Nucleotides and derivatives	Nucleotides and derivatives	50-89-5	B	451300	325860	347720	1530700	1392100	614490	1.24725	3.14459	-1.65287	down
pme0033	C5H4N4O	Hypoxanthine	Nucleotides and derivatives	Nucleotides and derivatives	68-94-0	A	4063600	3462900	3264000	14651000	13146000	6426600	1.29267	3.17164	-1.66523	down
pmn001689	C18H32O4	9-Hydroxy-12-oxo-10-octadecenoic acid*	Lipids	Free fatty acids	-	B	42224	19170	20615	124570	113040	33948	1.07967	3.31132	-1.72741	down
mws0572	C5H7N3O	5-Methylcytosine	Nucleotides and derivatives	Nucleotides and derivatives	554-01-8	B	72476	48902	58800	235150	233530	156650	1.38453	3.47062	-1.79519	down
mws2218	C8H10N4O2	Caffeine	Alkaloids	Alkaloids	58-08-2	B	79238	74312	100660	630570	353070	240820	1.33716	4.81673	-2.26805	down
pme1194	C9H13N3O4	Deoxycytidine	Nucleotides and derivatives	Nucleotides and derivatives	951-77-9	B	872800	613220	612110	5004300	4177500	1306200	1.23368	4.99874	-2.32156	down
MR
Index	Formula	Compounds	Class I	Class II	CAS	Level	CK-1	CK-2	CK-3	Al-1	Al-2	Al-3	VIP	Fold_Change	Log2FC	Type
mws2218	C8H10N4O2	Caffeine	Alkaloids	Alkaloids	58-08-2	B	245030	331020	778130	66058	197860	69315	1.25013	0.246077	2.02282	up
pmp000130	C39H50O23	Natsudaidain 3-O-(5-glucosyl-3-hydroxy-3-methylglutarate)-glucoside)	Flavonoids	Flavonols	-	A	123910	100480	123900	38771	21868	44438	1.44161	0.301694	1.72884	up
mws1060	C10H12N4O5	9-(β-D-Arabinofuranosyl)hypoxanthine	Nucleotides and derivatives	Nucleotides and derivatives	7013-16-3	A	3053700	1885700	2737300	756240	1123600	990240	1.4349	0.373869	1.4194	up
pmb0069	C7H7NO	Benzamide	Others	Others	55-21-0	B	7081000	7427300	7297900	2874600	2733900	2855000	1.53094	0.388124	1.36541	up
pmb3116	C23H42NO7P	LysoPE 18:3	Lipids	LPE	-	B	18171	25674	13801	5150.2	9497	8520.5	1.33324	0.401896	1.31511	up
mws0268	C10H12N4O5	Inosine	Nucleotides and derivatives	Nucleotides and derivatives	58-63-9	B	44986	38658	43005	19095	23583	13344	1.41295	0.442341	1.17677	up
pme1261	C9H19NO4	Pantothenol	Others	Saccharides and Alcohols	16485-10-2	B	4490500	5511100	6165500	2991900	2298800	2121600	1.4389	0.45848	1.12507	up
pmb0197	C11H15N5O5	N2-methylguanosine	Nucleotides and derivatives	Nucleotides and derivatives	-	B	293810	136050	358830	143520	108050	113070	1.15167	0.462336	1.11299	up
pmb3894	C17H14O7	Di-O-methylquercetin	Flavonoids	Flavonols	2068-02-2	A	18049000	19207000	16090000	7821700	8946500	8372700	1.51028	0.47128	1.08534	up
pmb0508	C14H20N4O2	N-p-Coumaroyl agmatine	Alkaloids	Phenolamine	7295-86-5	A	1553800	1134900	1558000	716370	614330	687420	1.46481	0.475221	1.07333	up
pmb0880	C23H48NO7P	LysoPE 18:0(2n isomer)	Lipids	LPE	-	B	359980	372360	406900	743640	972390	822760	1.49776	2.22849	-1.15607	down
mws2209	C21H20O11	Astragalin*	Flavonoids	Flavonols	480-10-4	B	19956	10002	57016	76680	46775	72351	1.0722	2.25132	-1.17077	down
mws0371	C22H32O2	Cis-4,7,10,13,16,19-Docosahexaenoic Acid(C22:6n3)	Lipids	Free fatty acids	6217-54-5	B	846.51	1418.3	1580.2	2607.7	3337.1	3256	1.39196	2.39292	-1.25877	down
mws0376	C4H4O4	Fumaric acid	Organic acids	Organic acids	110-17-8	B	254670	249280	211200	296680	985890	430810	1.10389	2.39583	-1.26053	down
YC512118	C18H35NO	Octadecenoic amide	Others	Others	-	A	598950	614560	848710	1799200	2001000	1278000	1.43185	2.46249	-1.30012	down
Zmhn003534	C21H22O10	Naringenin-O-glucoside	Flavonoids	Flavonoid	-	A	163760	51406	613430	860000	422250	883330	1.02774	2.61355	-1.38601	down
mws0093	C10H12O3	Coniferyl alcohol	Phenolic acids	Phenolic acids	458-35-5	B	60126	67579	53127	108860	266980	115220	1.28656	2.71556	-1.44125	down
pmb0530	C21H27N7O14P2	Nicotinic acid adenine dinucleotide	Nucleotides and derivatives	Nucleotides and derivatives	53-84-9	A	1070000	838290	961820	3210200	2609700	2381000	1.49965	2.85735	-1.51468	down
mws0251	C5H6N2O2	Thymine	Nucleotides and derivatives	Nucleotides and derivatives	65-71-4	B	322710	291390	158780	455860	1233900	702890	1.27446	3.09576	-1.63029	down
mws0425	C5H6O4	Citraconic acid	Organic acids	Organic acids	498-23-7	B	64789	59368	67695	133350	396130	172430	1.33875	3.6586	-1.87129	down

## Sheet: Table S8
	Unigene ID	geneName	KEGG No.	Al-1	Al-2	Al-3	CK-1	CK-2	CK-3
KR	Os07g0639400	E1.11.1.7	K00430	11.0069	14.0944	18.638	4.22776	5.0073	3.64332
	Os06g0521900	E1.11.1.7	K00430	56.7076	27.7317	25.3707	5.28196	9.39873	5.39172
	Os01g0270300	E1.11.1.7	K00430	6.62586	8.65321	6.62595	3.4489	3.11185	2.8992
	Os04g0688100	E1.11.1.7	K00430	737.247	595.364	624.454	1320.44	1673.15	1015.37
	Os04g0688300	E1.11.1.7	K00430	299.646	215.277	243.385	492.166	823.929	461.373
	Os01g0294700	E1.11.1.7	K00430	101.221	203.945	225.258	84.248	80.3524	66.3988
	Os06g0522300	E1.11.1.7	K00430	46.1298	19.3241	17.5019	5.61885	13.0031	7.33981
	Os11g0112200	E1.11.1.7	K00430	4.88887	4.42854	3.65353	6.87254	11.2145	8.8419
	Os07g0677300	E1.11.1.7	K00430	5.07751	17.586	27.0938	5.85516	2.90589	4.02521
	Os05g0134800	E1.11.1.7	K00430	6.8976	15.3869	14.1258	5.4595	6.07401	3.39537
	Os03g0234500	E1.11.1.7	K00430	25.6626	6.30257	6.67368	1.6776	5.45447	1.62959
MR	Os05g0427400	PAL	K10775	113.993	98.5862	96.3794	57.8819	46.4978	48.7014
	Os02g0626532	PAL	K10775	1.01531	0.711397	0.639627	0.206648	0.171552	0.170473
	Os08g0448000	4CL	K01904	10.7095	10.5594	7.87046	5.25481	3.73468	4.1478
	Os02g0467600	C4H	K00487	4.78606	3.90445	2.17711	1.56683	1.02432	0.678588
	Os04g0229100	CAD	K00083	3.19702	3.15487	1.99655	4.94529	6.36863	6.46457
	Os07g0531400	E1.11.1.7	K00430	3.04055	3.87015	2.61908	5.0392	6.50745	7.96052
	Os06g0522300	E1.11.1.7	K00430	17.518	15.4694	9.96476	2.92582	4.85003	4.4188
	Os03g0234500	E1.11.1.7	K00430	17.6483	12.8281	6.39884	3.33774	2.60883	1.82597
	Os06g0521500	E1.11.1.7	K00430	31.3044	25.853	16.5476	12.7257	9.21753	10.7402
	Os06g0521400	E1.11.1.7	K00430	3.89664	3.47487	1.70769	0.0755325	0.365775	0.261702
	Os06g0521900	E1.11.1.7	K00430	10.8789	12.0575	6.19798	3.16316	1.9607	4.52997
